# Supplementary material for: Electroacupuncture Improves Trinitrobenzene Sulfonic Acid-Induced Colitis, Evaluated by Transcriptomic Study
Source: Evid Based Complement Alternat Med. 2014 Jun 9;2014:942196. doi: 10.1155/2014/942196 (PMC4068094; doi:10.1155/2014/942196)
Supplement: Supplementary file 1 — Supplementary Table 1 shows that EA affected the expression of genes involved in inflammation-associated pathways in colons and affected the expression of genes involved in immunity pathways in spleens. [file 942196.f1.xlsx]

## Sheet: Table 1
Table 1 Information of genes in each pathway affected by EA in TNBS-induced colitis.
IL1 Signaling Pathway
Gene symbol	Gene description	FC_Colonic tissue	FC_Spleen	SD_Colonic tissue	SD_Spleen	p-value_Colonic tissue	p-value_Spleen
Akt1	RAC-alpha serine/threonine-protein kinase (EC 2.7.11.1)(RAC-PK-alpha)(AKT1 kinase)(C-AKT)(Protein kinase B)(PKB)(Thymoma viral proto-oncogene) [Source:UniProtKB/Swiss-Prot;Acc:P31750]	1.09115	-1.09456	0.0796592	0.102268	0.379037	0.00723133
Il1b	Interleukin-1 beta Precursor (IL-1 beta) [Source:UniProtKB/Swiss-Prot;Acc:P10749]	-1.84255	1.25981	0.103641	0.301941	0.412433	0.373897
Mapk1	Mitogen-activated protein kinase 1 (EC 2.7.11.24)(Extracellular signal-regulated kinase 2)(ERK-2)(Mitogen-activated protein kinase 2)(MAP kinase 2)(MAPK 2)(p42-MAPK)(ERT1) [Source:UniProtKB/Swiss-Prot;Acc:P63085]	1.62462	-1.39753	0.517039	0.291029	0.163504	0.520551
Mapk14	Mitogen-activated protein kinase 14 (EC 2.7.11.24)(Mitogen-activated protein kinase p38 alpha)(MAP kinase p38 alpha)(CRK1) [Source:UniProtKB/Swiss-Prot;Acc:P47811]	1.06459	-1.05161	0.072838	0.0943043	0.899439	0.432324
Mmp9	Matrix metalloproteinase-9 Precursor (MMP-9)(EC 3.4.24.35)(92 kDa type IV collagenase)(92 kDa gelatinase)(Gelatinase B)(GELB) [Source:UniProtKB/Swiss-Prot;Acc:P41245]	-1.20705	1.03955	0.190873	0.0535773	0.81344	0.473283
Csf2	Granulocyte-macrophage colony-stimulating factor Precursor (GM-CSF)(Colony-stimulating factor)(CSF) [Source:UniProtKB/Swiss-Prot;Acc:P01587]	1.01424	1.02379	0.194673	0.036304	0.516914	0.965724
Icam1	Intercellular adhesion molecule 1 Precursor (ICAM-1)(MALA-2)(MyD10)(CD54 antigen) [Source:UniProtKB/Swiss-Prot;Acc:P13597]	-1.30726	1.19089	0.225261	0.250216	0.916989	0.380328
Il1r2	Interleukin-1 receptor type II Precursor (IL-1R-2)(IL-1R-beta)(CD121 antigen-like family member B)(CD121b antigen) [Source:UniProtKB/Swiss-Prot;Acc:P27931]	-1.31712	1.2472	0.133911	0.309885	0.399238	0.759826
Map2k4	Dual specificity mitogen-activated protein kinase kinase 4 (MAP kinase kinase 4)(MAPKK 4)(EC 2.7.12.2)(MAPK/ERK kinase 4)(JNK-activating kinase 1)(C-JUN N-terminal kinase kinase 1)(JNK kinase 1)(JNKK 1)(SAPK/ERK kinase 1)(SEK1) [Source:UniProtKB/Swiss-Prot;Acc:P47809]	-1.05378	-1.0384	0.0908184	0.0222131	0.304805	0.805571
Myd88	Myeloid differentiation primary response protein MyD88 [Source:UniProtKB/Swiss-Prot;Acc:P22366]	-1.39481	1.1683	0.405217	0.0857885	0.35685	0.0757836
Nfkbib	NF-kappa-B inhibitor beta (NF-kappa-BIB)(I-kappa-B-beta)(IkappaBbeta)(IkB-beta)(IkB-B) [Source:UniProtKB/Swiss-Prot;Acc:Q60778]	-1.12627	1.08216	0.117907	0.0857985	0.253138	0.352129
Fkbp10	FK506-binding protein 10 Precursor (EC 5.2.1.8)(Peptidyl-prolyl cis-trans isomerase)(PPIase)(Rotamase)(Immunophilin FKBP65)(65 kDa FK506-binding protein)(FKBP65) [Source:UniProtKB/Swiss-Prot;Acc:Q61576]	-1.57206	-1.18001	0.431827	0.191579	0.995491	0.494645
Il1a	Interleukin-1 alpha Precursor (IL-1 alpha) [Source:UniProtKB/Swiss-Prot;Acc:P01582]	-1.50179	1.0546	0.296284	0.0262509	0.445005	0.35502
Il1r1	Interleukin-1 receptor type I Precursor (IL-1R-1)(p80)(CD121 antigen-like family member A)(CD121a antigen) [Source:UniProtKB/Swiss-Prot;Acc:P13504]	1.54178	1.10955	0.683745	0.215271	0.348046	0.0772862
Il1rap	Interleukin-1 receptor accessory protein Precursor (IL-1 receptor accessory protein)(IL-1RAcP) [Source:UniProtKB/Swiss-Prot;Acc:Q61730]	2.95719	-1.00661	2.82759	0.0341261	0.424443	0.174789
Il2	Interleukin-2 Precursor (IL-2)(T-cell growth factor)(TCGF) [Source:UniProtKB/Swiss-Prot;Acc:P04351]	1.03365	1.06243	0.105884	0.0419066	0.836513	0.468051
Il6	Interleukin-6 Precursor (IL-6)(Interleukin HP-1)(B-cell hybridoma growth factor) [Source:UniProtKB/Swiss-Prot;Acc:P08505]	-1.65715	1.12469	0.341082	0.277773	0.392998	0.73838
Irak1	Interleukin-1 receptor-associated kinase 1 (IRAK-1)(IRAK)(EC 2.7.11.1)(Pelle-like protein kinase)(mPLK) [Source:UniProtKB/Swiss-Prot;Acc:Q62406]	2.5602	1.49616	2.29058	0.229104	0.682941	0.0283199
Map3k1	Mitogen-activated protein kinase kinase kinase 1 (EC 2.7.11.25)(MAPK/ERK kinase kinase 1)(MEK kinase 1)(MEKK 1) [Source:UniProtKB/Swiss-Prot;Acc:P53349]	1.22373	-1.32167	0.942919	0.346665	0.231556	0.728649
Mapk8	Mitogen-activated protein kinase 8 (EC 2.7.11.24)(Stress-activated protein kinase JNK1)(c-Jun N-terminal kinase 1) [Source:UniProtKB/Swiss-Prot;Acc:Q91Y86]	1.66258	1.05255	0.882626	0.0578773	0.426945	0.168836
Nfkb1	Nuclear factor NF-kappa-B p105 subunit (DNA-binding factor KBF1)(EBP-1)(NF-kappa-B1 p84/NF-kappa-B1 p98) [Contains Nuclear factor NF-kappa-B p50 subunit] [Source:UniProtKB/Swiss-Prot;Acc:P25799]	-1.25329	-1.11876	0.554502	0.237395	0.332152	0.61692
Ptgs2	Prostaglandin G/H synthase 2 Precursor (EC 1.14.99.1)(Cyclooxygenase-2)(COX-2)(Prostaglandin-endoperoxide synthase 2)(Prostaglandin H2 synthase 2)(PGH synthase 2)(PGHS-2)(PHS II)(Glucocorticoid-regulated inflammatory cyclooxygenase)(Gripghs)(TIS10 protein)(Macrophage activation-associated marker protein P71/73)(PES-2) [Source:UniProtKB/Swiss-Prot;Acc:Q05769]	1.12708	1.01076	0.237188	0.0683713	0.71652	0.454695
Rac1	Ras-related C3 botulinum toxin substrate 1 Precursor (p21-Rac1) [Source:UniProtKB/Swiss-Prot;Acc:P63001]	-3.31461	-1.07038	0.341161	0.177878	0.96906	0.567036
Tgfb1	Transforming growth factor beta-1 Precursor (TGF-beta-1) [Contains Latency-associated peptide(LAP)] [Source:UniProtKB/Swiss-Prot;Acc:P04202]	-1.06116	-1.25618	0.0520643	0.186892	0.455685	0.386625
Tnf	Tumor necrosis factor Precursor (TNF-alpha)(Tumor necrosis factor ligand superfamily member 2)(TNF-a)(Cachectin) [Contains Tumor necrosis factor, membrane form;Tumor necrosis factor, soluble form] [Source:UniProtKB/Swiss-Prot;Acc:P06804]	-1.09467	1.01235	0.0744647	0.0316981	0.856612	0.674279
Traf6	TNF receptor-associated factor 6 [Source:UniProtKB/Swiss-Prot;Acc:P70196]	-1.01486	1.00669	0.0456712	0.05793	0.554431	0.336641
Vcam1	Vascular cell adhesion protein 1 Precursor (V-CAM 1)(CD106 antigen) [Source:UniProtKB/Swiss-Prot;Acc:P29533]	-2.78049	1.04374	0.344479	0.139743	0.601464	0.588528
IL1beta Signaling Pathway
Gene symbol	Gene description	FC_Colonic tissue	FC_Spleen	SD_Colonic tissue	SD_Spleen	p-value_Colonic tissue	p-value_Spleen
Ccl2	C-C motif chemokine 2 Precursor (Small-inducible cytokine A2)(Monocyte chemoattractant protein 1)(Monocyte chemotactic protein 1)(MCP-1)(Platelet-derived growth factor-inducible protein JE) [Source:UniProtKB/Swiss-Prot;Acc:P10148]	1.29112	1.04486	0.522013	0.0034669	0.407399	0.748737
Hgf	Hepatocyte growth factor Precursor (Scatter factor)(SF)(Hepatopoeitin-A) [Contains Hepatocyte growth factor alpha chain;Hepatocyte growth factor beta chain] [Source:UniProtKB/Swiss-Prot;Acc:Q08048]	-1.14744	1.0264	0.121636	0.0610254	0.463224	0.337915
Icam1	Intercellular adhesion molecule 1 Precursor (ICAM-1)(MALA-2)(MyD10)(CD54 antigen) [Source:UniProtKB/Swiss-Prot;Acc:P13597]	-1.30726	1.19089	0.225261	0.250216	0.916989	0.380328
Pecam1	Platelet endothelial cell adhesion molecule Precursor (PECAM-1)(CD31 antigen) [Source:UniProtKB/Swiss-Prot;Acc:Q08481]	-1.94061	-1.01711	0.647572	0.347952	0.941193	0.250795
Tnfrsf11b	Tumor necrosis factor receptor superfamily member 11B Precursor (Osteoprotegerin)(Osteoclastogenesis inhibitory factor) [Source:UniProtKB/Swiss-Prot;Acc:O08712]	-1.76629	-1.05828	0.446765	0.0659726	0.978659	0.223251
Vcam1	Vascular cell adhesion protein 1 Precursor (V-CAM 1)(CD106 antigen) [Source:UniProtKB/Swiss-Prot;Acc:P29533]	-2.78049	1.04374	0.344479	0.139743	0.601464	0.588528
Cdh2	Cadherin-2 Precursor (Neural cadherin)(N-cadherin)(CD325 antigen) [Source:UniProtKB/Swiss-Prot;Acc:P15116]	2.72334	1.00167	2.3585	0.0343172	0.406851	0.944536
Cxcl2	C-X-C motif chemokine 2 Precursor (Macrophage inflammatory protein 2)(MIP2) [Source:UniProtKB/Swiss-Prot;Acc:P10889]	-1.42005	-1.03558	0.252864	0.0143249	0.610069	0.0708693
Il1b	Interleukin-1 beta Precursor (IL-1 beta) [Source:UniProtKB/Swiss-Prot;Acc:P10749]	-1.84255	1.25981	0.103641	0.301941	0.412433	0.373897
Il6st	Interleukin-6 receptor subunit beta Precursor (IL-6R-beta)(Interleukin-6 signal transducer)(Membrane glycoprotein 130)(gp130)(Oncostatin-M receptor subunit alpha)(CD130 antigen) [Source:UniProtKB/Swiss-Prot;Acc:Q00560]	1.03986	-1.05498	0.0953169	0.0289903	0.839359	0.743296
Stat3	Signal transducer and activator of transcription 3 (Acute-phase response factor) [Source:UniProtKB/Swiss-Prot;Acc:P42227]	1.07444	-1.08203	1.0713	0.300577	0.945996	0.559166
Tnf	Tumor necrosis factor Precursor (TNF-alpha)(Tumor necrosis factor ligand superfamily member 2)(TNF-a)(Cachectin) [Contains Tumor necrosis factor, membrane form;Tumor necrosis factor, soluble form] [Source:UniProtKB/Swiss-Prot;Acc:P06804]	-1.09467	1.01235	0.0744647	0.0316981	0.856612	0.674279
Tnfsf11	Tumor necrosis factor ligand superfamily member 11 (Receptor activator of nuclear factor kappa B ligand)(RANKL)(TNF-related activation-induced cytokine)(TRANCE)(Osteoprotegerin ligand)(OPGL)(Osteoclast differentiation factor)(ODF)(CD254 antigen) [Contains Tumor necrosis factor ligand superfamily member 11, membrane form;Tumor necrosis factor ligand superfamily member 11, soluble form] [Source:Uni…	1.0084	1.13758	0.322317	0.493422	0.139661	0.76613
Vegfa	Vascular endothelial growth factor A Precursor (VEGF-A)(Vascular permeability factor)(VPF) [Source:UniProtKB/Swiss-Prot;Acc:Q00731]	-1.85718	1.29748	0.34431	0.421856	0.480872	0.153718
Interleukin Signaling Pathway
Gene symbol	Gene description	FC_Colonic tissue	FC_Spleen	SD_Colonic tissue	SD_Spleen	p-value_Colonic tissue	p-value_Spleen
Ccl3	C-C motif chemokine 3 Precursor (Small-inducible cytokine A3)(Macrophage inflammatory protein 1-alpha)(MIP-1-alpha)(TY-5)(SIS-alpha)(Heparin-binding chemotaxis protein)(L2G25B) [Source:UniProtKB/Swiss-Prot;Acc:P10855]	-1.33261	-1.05014	0.268583	0.00894599	0.362193	0.483785
Comp	Cartilage oligomeric matrix protein Precursor (COMP) [Source:UniProtKB/Swiss-Prot;Acc:Q9R0G6]	1.12411	-1.04885	0.224317	0.0515747	0.885761	0.609986
Il13	Interleukin-13 Precursor (IL-13)(T-cell activation protein P600) [Source:UniProtKB/Swiss-Prot;Acc:P20109]	-3.58627	1.16268	0.303657	0.364248	0.195456	0.389122
Il1rn	Interleukin-1 receptor antagonist protein Precursor (IL-1ra)(IL-1RN)(IRAP)(IL1 inhibitor) [Source:UniProtKB/Swiss-Prot;Acc:P25085]	-1.09002	-1.00946	0.244863	0.0808549	0.072712	0.136846
Il4ra	Interleukin-4 receptor alpha chain Precursor (IL-4R-alpha)(CD124 antigen) [Contains Soluble interleukin-4 receptor alpha chain(IL-4-binding protein)(IL4-BP)] [Source:UniProtKB/Swiss-Prot;Acc:P16382]	-1.7689	1.00807	0.355958	0.410976	0.268605	0.890422
Il9	Interleukin-9 Precursor (IL-9)(T-cell growth factor P40)(P40 cytokine) [Source:UniProtKB/Swiss-Prot;Acc:P15247]	-1.16104	1.00825	0.0683678	0.0470235	0.342371	0.66175
Mapk9	Mitogen-activated protein kinase 9 (EC 2.7.11.24)(Stress-activated protein kinase JNK2)(c-Jun N-terminal kinase 2) [Source:UniProtKB/Swiss-Prot;Acc:Q9WTU6]	-1.01787	-1.53993	1.19489	0.22643	0.891054	0.128401
Muc2	Colonic mucin MUC2 Fragment [Source:UniProtKB/TrEMBL;Acc:Q9Z2U5]	1.08787	1.12624	0.300074	0.09261	0.953424	0.964831
Tnfrsf11a	Tumor necrosis factor receptor superfamily member 11A Precursor (Receptor activator of NF-KB)(Osteoclast differentiation factor receptor)(ODFR)(CD265 antigen) [Source:UniProtKB/Swiss-Prot;Acc:O35305]	1.05301	-1.03381	0.0565801	0.0704974	0.256444	0.346219
Arg1	Arginase-1 (EC 3.5.3.1)(Type I arginase)(Liver-type arginase) [Source:UniProtKB/Swiss-Prot;Acc:Q61176]	-4.72303	1.03974	0.144942	0.0324083	0.721208	0.755075
Arg2	Arginase-2, mitochondrial Precursor (Arginase II)(EC 3.5.3.1)(Non-hepatic arginase)(Kidney-type arginase) [Source:UniProtKB/Swiss-Prot;Acc:O08691]	1.03877	-1.02032	0.0430278	0.00281682	0.357967	0.517695
Ccl2	C-C motif chemokine 2 Precursor (Small-inducible cytokine A2)(Monocyte chemoattractant protein 1)(Monocyte chemotactic protein 1)(MCP-1)(Platelet-derived growth factor-inducible protein JE) [Source:UniProtKB/Swiss-Prot;Acc:P10148]	1.29112	1.04486	0.522013	0.0034669	0.407399	0.748737
Chi3l3	Chitinase-3-like protein 3 Precursor (Secreted protein Ym1)(Eosinophil chemotactic cytokine)(ECF-L) [Source:UniProtKB/Swiss-Prot;Acc:O35744]	-1.2063	-1.03568	0.128371	0.303519	0.248984	0.0764759
Clca3	Calcium-activated chloride channel regulator 1 Precursor (Calcium-activated chloride channel family member 3)(mCLCA3)(Protein gob-5) [Source:UniProtKB/Swiss-Prot;Acc:Q9D7Z6]	-1.091	1.04341	0.0909733	0.0931346	0.971231	0.941937
Ctsk	Cathepsin K Precursor (EC 3.4.22.38) [Source:UniProtKB/Swiss-Prot;Acc:P55097]	1.09012	-1.01605	0.16781	0.0546119	0.387338	0.643992
Cxcl2	C-X-C motif chemokine 2 Precursor (Macrophage inflammatory protein 2)(MIP2) [Source:UniProtKB/Swiss-Prot;Acc:P10889]	-1.42005	-1.03558	0.252864	0.0143249	0.610069	0.0708693
Dok2	Docking protein 2 (Downstream of tyrosine kinase 2)(p56(dok-2))(Dok-related protein)(Dok-R)(IL-four receptor-interacting protein)(FRIP) [Source:UniProtKB/Swiss-Prot;Acc:O70469]	-1.1214	1.0078	0.0320103	0.0398618	0.334686	0.39293
Ifng	Interferon gamma Precursor (IFN-gamma) [Source:UniProtKB/Swiss-Prot;Acc:P01580]	1.70497	1.27111	0.773608	0.233596	0.460501	0.848646
Igh-1a	Immunoglobulin heavy chain C gene segment [Source:IMGT/GENE-DB;Acc:IGHG2C]	-1.06123	-1.11815	0.0157138	0.275564	0.470914	0.949106
Akt1	RAC-alpha serine/threonine-protein kinase (EC 2.7.11.1)(RAC-PK-alpha)(AKT1 kinase)(C-AKT)(Protein kinase B)(PKB)(Thymoma viral proto-oncogene) [Source:UniProtKB/Swiss-Prot;Acc:P31750]	1.09115	-1.09456	0.0796592	0.102268	0.379037	0.00723133
Il12a	Interleukin-12 subunit alpha Precursor (IL-12A)(IL-12 subunit p35)(Cytotoxic lymphocyte maturation factor 35 kDa subunit)(CLMF p35) [Source:UniProtKB/Swiss-Prot;Acc:P43431]	-1.04321	1.08067	0.0807464	0.077818	0.355763	0.119547
Il12b	Interleukin-12 subunit beta Precursor (IL-12B)(IL-12 subunit p40)(Cytotoxic lymphocyte maturation factor 40 kDa subunit)(CLMF p40) [Source:UniProtKB/Swiss-Prot;Acc:P43432]	-1.42027	1.03538	0.311117	0.0447355	0.532507	0.378501
Il18	Interleukin-18 Precursor (IL-18)(Interferon-gamma-inducing factor)(IFN-gamma-inducing factor)(Interleukin-1 gamma)(IL-1 gamma) [Source:UniProtKB/Swiss-Prot;Acc:P70380]	-4.33965	1.21064	0.234137	0.340129	0.46594	0.54581
Il18bp	Interleukin-18-binding protein Precursor (IL-18BP)(Interferon gamma-inducing factor-binding protein) [Source:UniProtKB/Swiss-Prot;Acc:Q9Z0M9]	-1.49355	1.18746	0.358534	0.175688	0.501219	0.39535
Il4	Interleukin-4 Precursor (IL-4)(B-cell stimulatory factor 1)(BSF-1)(Lymphocyte stimulatory factor 1)(IGG1 induction factor)(B-cell IgG differentiation factor)(B-cell growth factor 1) [Source:UniProtKB/Swiss-Prot;Acc:P07750]	1.00919	1.05759	0.048933	0.024408	0.338929	0.859972
Il5	Interleukin-5 Precursor (IL-5)(T-cell replacing factor)(TRF)(Eosinophil differentiation factor)(B-cell growth factor II)(BCGF-II)(Cytotoxic T-lymphocyte inducer) [Source:UniProtKB/Swiss-Prot;Acc:P04401]	-1.02907	-1.00587	0.077896	0.0809283	0.814889	0.272955
Il6	Interleukin-6 Precursor (IL-6)(Interleukin HP-1)(B-cell hybridoma growth factor) [Source:UniProtKB/Swiss-Prot;Acc:P08505]	-1.65715	1.12469	0.341082	0.277773	0.392998	0.73838
Jak1	Tyrosine-protein kinase JAK1 (EC 2.7.10.2)(Janus kinase 1)(JAK-1) [Source:UniProtKB/Swiss-Prot;Acc:P52332]	1.11448	1.5498	1.2527	0.820108	0.363874	0.259592
Mapk8	Mitogen-activated protein kinase 8 (EC 2.7.11.24)(Stress-activated protein kinase JNK1)(c-Jun N-terminal kinase 1) [Source:UniProtKB/Swiss-Prot;Acc:Q91Y86]	1.66258	1.05255	0.882626	0.0578773	0.426945	0.168836
Mmp13	Collagenase 3 Precursor (EC 3.4.24.-)(Matrix metalloproteinase-13)(MMP-13) [Source:UniProtKB/Swiss-Prot;Acc:P33435]	-1.45539	1.09843	0.32877	0.0869191	0.751853	0.103316
Mmp3	Stromelysin-1 Precursor (SL-1)(EC 3.4.24.17)(Matrix metalloproteinase-3)(MMP-3)(Transin-1)(EMS-2) [Source:UniProtKB/Swiss-Prot;Acc:P28862]	-1.35007	1.01271	0.152511	0.0141759	0.675565	0.444639
Muc5ac	mucin 5, subtypes A and C, tracheobronchial/gastric [Source:RefSeq peptide;Acc:NP_034974]	158.996	1.00454	223.488	0.0654479	0.422481	0.658369
Stat6	Signal transducer and transcription activator 6 [Source:UniProtKB/Swiss-Prot;Acc:P52633]	2.16575	1.00737	1.67779	0.0625873	0.404964	0.947791
Tnfsf11	Tumor necrosis factor ligand superfamily member 11 (Receptor activator of nuclear factor kappa B ligand)(RANKL)(TNF-related activation-induced cytokine)(TRANCE)(Osteoprotegerin ligand)(OPGL)(Osteoclast differentiation factor)(ODF)(CD254 antigen) [Contains Tumor necrosis factor ligand superfamily member 11, membrane form;Tumor necrosis factor ligand superfamily member 11, soluble form] [Source:Uni…	1.0084	1.13758	0.322317	0.493422	0.139661	0.76613
Vcam1	Vascular cell adhesion protein 1 Precursor (V-CAM 1)(CD106 antigen) [Source:UniProtKB/Swiss-Prot;Acc:P29533]	-2.78049	1.04374	0.344479	0.139743	0.601464	0.588528
Il11	Interleukin-11 Precursor (IL-11) [Source:UniProtKB/Swiss-Prot;Acc:P47873]	-1.84297	1.01152	0.541804	0.0750368	0.336197	0.278185
Acp5	Tartrate-resistant acid phosphatase type 5 Precursor (TR-AP)(EC 3.1.3.2)(Tartrate-resistant acid ATPase)(TrATPase)(Acid phosphatase 5, tartrate resistant) [Source:UniProtKB/Swiss-Prot;Acc:Q05117]	1.43864	1.15175	0.218307	0.329926	0.321231	0.923617
Col2a1	Collagen alpha-1(II) chain Precursor (Alpha-1 type II collagen) [Contains Chondrocalcin] [Source:UniProtKB/Swiss-Prot;Acc:P28481]	1.05549	1.03444	0.0198066	0.0365576	0.749649	0.26236
Il1a	Interleukin-1 alpha Precursor (IL-1 alpha) [Source:UniProtKB/Swiss-Prot;Acc:P01582]	-1.50179	1.0546	0.296284	0.0262509	0.445005	0.35502
Il1b	Interleukin-1 beta Precursor (IL-1 beta) [Source:UniProtKB/Swiss-Prot;Acc:P10749]	-1.84255	1.25981	0.103641	0.301941	0.412433	0.373897
Il6st	Interleukin-6 receptor subunit beta Precursor (IL-6R-beta)(Interleukin-6 signal transducer)(Membrane glycoprotein 130)(gp130)(Oncostatin-M receptor subunit alpha)(CD130 antigen) [Source:UniProtKB/Swiss-Prot;Acc:Q00560]	1.03986	-1.05498	0.0953169	0.0289903	0.839359	0.743296
Mapk1	Mitogen-activated protein kinase 1 (EC 2.7.11.24)(Extracellular signal-regulated kinase 2)(ERK-2)(Mitogen-activated protein kinase 2)(MAP kinase 2)(MAPK 2)(p42-MAPK)(ERT1) [Source:UniProtKB/Swiss-Prot;Acc:P63085]	1.62462	-1.39753	0.517039	0.291029	0.163504	0.520551
Mapk14	Mitogen-activated protein kinase 14 (EC 2.7.11.24)(Mitogen-activated protein kinase p38 alpha)(MAP kinase p38 alpha)(CRK1) [Source:UniProtKB/Swiss-Prot;Acc:P47811]	1.06459	-1.05161	0.072838	0.0943043	0.899439	0.432324
Mapk3	Mitogen-activated protein kinase 3 (EC 2.7.11.24)(Extracellular signal-regulated kinase 1)(ERK-1)(Insulin-stimulated MAP2 kinase)(MAP kinase 1)(MAPK 1)(p44-ERK1)(ERT2)(p44-MAPK)(Microtubule-associated protein 2 kinase)(MNK1) [Source:UniProtKB/Swiss-Prot;Acc:Q63844]	1.08265	1.10983	1.62436	0.201034	0.904512	0.420836
Nfkbia	NF-kappa-B inhibitor alpha (I-kappa-B-alpha)(IkappaBalpha)(IkB-alpha) [Source:UniProtKB/Swiss-Prot;Acc:Q9Z1E3]	1.00095	-1.05261	0.0944346	0.0653776	0.967544	0.462974
Rela	Transcription factor p65 (Nuclear factor NF-kappa-B p65 subunit) [Source:UniProtKB/Swiss-Prot;Acc:Q04207]	1.73816	-1.25723	2.10548	0.0963272	0.495858	0.87241
Sox9	Transcription factor SOX-9 [Source:UniProtKB/Swiss-Prot;Acc:Q04887]	-1.01062	1.35294	1.31608	0.274749	0.717133	0.409831
IL11 Signaling Pathway
Gene symbol	Gene description	FC_Colonic tissue	FC_Spleen	SD_Colonic tissue	SD_Spleen	p-value_Colonic tissue	p-value_Spleen
Il11	Interleukin-11 Precursor (IL-11) [Source:UniProtKB/Swiss-Prot;Acc:P47873]	-1.84297	1.01152	0.541804	0.0750368	0.336197	0.278185
Tnfrsf11b	Tumor necrosis factor receptor superfamily member 11B Precursor (Osteoprotegerin)(Osteoclastogenesis inhibitory factor) [Source:UniProtKB/Swiss-Prot;Acc:O08712]	-1.76629	-1.05828	0.446765	0.0659726	0.978659	0.223251
Bglap1	bone gamma carboxyglutamate protein 1 isoform 1 [Source:RefSeq peptide;Acc:NP_031567]	-2.04507	1.16584	0.396053	0.102548	0.91237	0.245657
Mmp13	Collagenase 3 Precursor (EC 3.4.24.-)(Matrix metalloproteinase-13)(MMP-13) [Source:UniProtKB/Swiss-Prot;Acc:P33435]	-1.45539	1.09843	0.32877	0.0869191	0.751853	0.103316
Spp1	Osteopontin Precursor (Bone sialoprotein 1)(Secreted phosphoprotein 1)(SPP-1)(Minopontin)(Early T-lymphocyte activation 1 protein)(2AR)(Calcium oxalate crystal growth inhibitor protein) [Source:UniProtKB/Swiss-Prot;Acc:P10923]	-2.64843	-1.01653	0.37007	0.0251679	0.768637	0.621352
Tnfsf11	Tumor necrosis factor ligand superfamily member 11 (Receptor activator of nuclear factor kappa B ligand)(RANKL)(TNF-related activation-induced cytokine)(TRANCE)(Osteoprotegerin ligand)(OPGL)(Osteoclast differentiation factor)(ODF)(CD254 antigen) [Contains Tumor necrosis factor ligand superfamily member 11, membrane form;Tumor necrosis factor ligand superfamily member 11, soluble form] [Source:Uni…	1.0084	1.13758	0.322317	0.493422	0.139661	0.76613
Fyn	Proto-oncogene tyrosine-protein kinase Fyn (EC 2.7.10.2)(p59-Fyn) [Source:UniProtKB/Swiss-Prot;Acc:P39688]	1.03523	-1.03326	0.182007	0.016308	0.750709	0.454966
Grb2	Growth factor receptor-bound protein 2 (Adapter protein GRB2)(SH2/SH3 adapter GRB2) [Source:UniProtKB/Swiss-Prot;Acc:Q60631]	1.17725	-1.41322	1.13957	0.26773	0.957676	0.170502
Jak2	Tyrosine-protein kinase JAK2 (EC 2.7.10.2)(Janus kinase 2)(JAK-2) [Source:UniProtKB/Swiss-Prot;Acc:Q62120]	1.08765	-1.01359	0.179496	0.0421558	0.681053	0.750551
Ptpn11	Tyrosine-protein phosphatase non-receptor type 11 (EC 3.1.3.48)(Protein-tyrosine phosphatase SYP)(SH-PTP2)(SHP-2)(Shp2) [Source:UniProtKB/Swiss-Prot;Acc:P35235]	-3.00464	1.05892	0.351405	0.111345	0.794356	0.0360793
Raf1	RAF proto-oncogene serine/threonine-protein kinase (EC 2.7.11.1)(C-RAF)(cRaf)(Raf-1) [Source:UniProtKB/Swiss-Prot;Acc:Q99N57]	1.1869	1.25229	1.57692	0.111715	0.802849	0.859534
TGFbeta Signaling Pathway
Gene symbol	Gene description	FC_Colonic tissue	FC_Spleen	SD_Colonic tissue	SD_Spleen	p-value_Colonic tissue	p-value_Spleen
Acp5	Tartrate-resistant acid phosphatase type 5 Precursor (TR-AP)(EC 3.1.3.2)(Tartrate-resistant acid ATPase)(TrATPase)(Acid phosphatase 5, tartrate resistant) [Source:UniProtKB/Swiss-Prot;Acc:Q05117]	1.43864	1.15175	0.218307	0.329926	0.321231	0.923617
Calcr	Calcitonin receptor Precursor (CT-R) [Source:UniProtKB/Swiss-Prot;Acc:Q60755]	-1.08616	1.01973	0.0510858	0.0235932	0.319409	0.884456
Cd14	Monocyte differentiation antigen CD14 Precursor (Myeloid cell-specific leucine-rich glycoprotein)(CD14 antigen) [Source:UniProtKB/Swiss-Prot;Acc:P10810]	-3.99494	1.23356	0.250834	0.456153	0.523672	0.868206
Ctsk	Cathepsin K Precursor (EC 3.4.22.38) [Source:UniProtKB/Swiss-Prot;Acc:P55097]	1.09012	-1.01605	0.16781	0.0546119	0.387338	0.643992
Mmp13	Collagenase 3 Precursor (EC 3.4.24.-)(Matrix metalloproteinase-13)(MMP-13) [Source:UniProtKB/Swiss-Prot;Acc:P33435]	-1.45539	1.09843	0.32877	0.0869191	0.751853	0.103316
Socs3	Suppressor of cytokine signaling 3 (SOCS-3)(Cytokine-inducible SH2 protein 3)(CIS-3)(Protein EF-10) [Source:UniProtKB/Swiss-Prot;Acc:O35718]	-1.84397	3.17668	0.598344	1.24715	0.976867	0.666552
Tgfbr1	TGF-beta receptor type-1 Precursor (EC 2.7.11.30)(Transforming growth factor-beta receptor type I)(TGF-beta receptor type I)(TGF-beta type I receptor)(TbetaR-I)(TGFR-1)(ESK2) [Source:UniProtKB/Swiss-Prot;Acc:Q64729]	-1.28923	1.00983	0.283357	0.0592425	0.792571	0.940217
Tnfrsf11a	Tumor necrosis factor receptor superfamily member 11A Precursor (Receptor activator of NF-KB)(Osteoclast differentiation factor receptor)(ODFR)(CD265 antigen) [Source:UniProtKB/Swiss-Prot;Acc:O35305]	1.05301	-1.03381	0.0565801	0.0704974	0.256444	0.346219
Csf1	Macrophage colony-stimulating factor 1 Precursor (CSF-1)(MCSF) [Contains Processed macrophage colony-stimulating factor 1] [Source:UniProtKB/Swiss-Prot;Acc:P07141]	2.09333	-1.79366	1.07761	0.325143	0.283744	0.433627
Egf	Pro-epidermal growth factor Precursor (EGF) [Contains Epidermal growth factor] [Source:UniProtKB/Swiss-Prot;Acc:P01132]	1.03427	1.00833	0.0482919	0.0625105	0.369657	0.339305
Fos	Proto-oncogene protein c-fos (Cellular oncogene fos) [Source:UniProtKB/Swiss-Prot;Acc:P01101]	-1.31645	1.5106	1.12509	0.27353	0.974241	0.931922
Irf9	Interferon regulatory factor 9 (IRF-9)(Transcriptional regulator ISGF3 subunit gamma)(IFN-alpha-responsive transcription factor subunit)(Interferon-stimulated gene factor 3 gamma)(ISGF3 p48 subunit)(ISGF-3 gamma) [Source:UniProtKB/Swiss-Prot;Acc:Q61179]	-1.59545	1.00471	0.38943	0.0662768	0.235607	0.395642
Itgav	Integrin alpha-V Precursor (Vitronectin receptor subunit alpha)(CD51 antigen) [Contains Integrin alpha-V heavy chain;Integrin alpha-V light chain] [Source:UniProtKB/Swiss-Prot;Acc:P43406]	1.10504	1.03571	0.330662	0.0443881	0.352314	0.876735
Itgb3	Integrin beta-3 Precursor (Platelet membrane glycoprotein IIIa)(GPIIIa)(CD61 antigen) [Source:UniProtKB/Swiss-Prot;Acc:O54890]	1.07728	1.01343	0.113803	0.0471523	0.495685	0.159188
Mapk1	Mitogen-activated protein kinase 1 (EC 2.7.11.24)(Extracellular signal-regulated kinase 2)(ERK-2)(Mitogen-activated protein kinase 2)(MAP kinase 2)(MAPK 2)(p42-MAPK)(ERT1) [Source:UniProtKB/Swiss-Prot;Acc:P63085]	1.62462	-1.39753	0.517039	0.291029	0.163504	0.520551
Mapk8	Mitogen-activated protein kinase 8 (EC 2.7.11.24)(Stress-activated protein kinase JNK1)(c-Jun N-terminal kinase 1) [Source:UniProtKB/Swiss-Prot;Acc:Q91Y86]	1.66258	1.05255	0.882626	0.0578773	0.426945	0.168836
Mmp3	Stromelysin-1 Precursor (SL-1)(EC 3.4.24.17)(Matrix metalloproteinase-3)(MMP-3)(Transin-1)(EMS-2) [Source:UniProtKB/Swiss-Prot;Acc:P28862]	-1.35007	1.01271	0.152511	0.0141759	0.675565	0.444639
Smad2	Mothers against decapentaplegic homolog 2 (Mothers against DPP homolog 2)(MAD homolog 2)(Mad-related protein 2)(mMad2)(SMAD 2) [Source:UniProtKB/Swiss-Prot;Acc:Q62432]	1.75703	1.00221	1.16055	0.0280344	0.429108	0.312804
Smad3	Mothers against decapentaplegic homolog 3 (Mad3)(mMad3)(Mothers against DPP homolog 3)(SMAD 3) [Source:UniProtKB/Swiss-Prot;Acc:Q8BUN5]	-1.86066	1.63348	0.244565	0.801146	0.409893	0.405173
Stat1	Signal transducer and activator of transcription 1 [Source:UniProtKB/Swiss-Prot;Acc:P42225]	-1.09927	1.0164	0.0798351	0.0489832	0.189739	0.429167
Stat2	Signal transducer and activator of transcription 2 [Source:UniProtKB/Swiss-Prot;Acc:Q9WVL2]	1.05766	-1.0214	0.162193	0.0178806	0.330143	0.139078
Tgfb1	Transforming growth factor beta-1 Precursor (TGF-beta-1) [Contains Latency-associated peptide(LAP)] [Source:UniProtKB/Swiss-Prot;Acc:P04202]	-1.06116	-1.25618	0.0520643	0.186892	0.455685	0.386625
Tgfb2	Transforming growth factor beta-2 Precursor (TGF-beta-2) [Source:UniProtKB/Swiss-Prot;Acc:P27090]	1.24498	1.28765	0.381606	0.138326	0.404049	0.450041
Tgfbr2	TGF-beta receptor type-2 Precursor (EC 2.7.11.30)(Transforming growth factor-beta receptor type II)(TGF-beta receptor type II)(TGF-beta type II receptor)(TbetaR-II)(TGFR-2) [Source:UniProtKB/Swiss-Prot;Acc:Q62312]	-1.08105	-1.03711	0.0877397	0.0157173	0.526762	0.743808
Tnfrsf11b	Tumor necrosis factor receptor superfamily member 11B Precursor (Osteoprotegerin)(Osteoclastogenesis inhibitory factor) [Source:UniProtKB/Swiss-Prot;Acc:O08712]	-1.76629	-1.05828	0.446765	0.0659726	0.978659	0.223251
Tnfsf11	Tumor necrosis factor ligand superfamily member 11 (Receptor activator of nuclear factor kappa B ligand)(RANKL)(TNF-related activation-induced cytokine)(TRANCE)(Osteoprotegerin ligand)(OPGL)(Osteoclast differentiation factor)(ODF)(CD254 antigen) [Contains Tumor necrosis factor ligand superfamily member 11, membrane form;Tumor necrosis factor ligand superfamily member 11, soluble form] [Source:Uni…	1.0084	1.13758	0.322317	0.493422	0.139661	0.76613
Actn3	Alpha-actinin-3 (Alpha-actinin skeletal muscle isoform 3)(F-actin cross-linking protein) [Source:UniProtKB/Swiss-Prot;Acc:O88990]	1.0775	-1.06412	0.190057	0.0260055	0.789575	0.599341
Bhlhb2	Class E basic helix-loop-helix protein 40 (bHLHe40)(Class B basic helix-loop-helix protein 2)(bHLHB2)(E47 interaction protein 1)(EIP1)(Stimulated by retinoic acid gene 13 protein) [Source:UniProtKB/Swiss-Prot;Acc:O35185]	-1.43502	1.92154	0.764967	0.662978	0.389622	0.00010747
Dcn	Decorin Precursor (Bone proteoglycan II)(PG-S2)(PG40) [Source:UniProtKB/Swiss-Prot;Acc:P28654]	-1.09669	-1.04575	0.301745	0.0834105	0.623162	0.0679852
Elk1	ETS domain-containing protein Elk-1 [Source:UniProtKB/Swiss-Prot;Acc:P41969]	-1.06431	1.03744	0.0470632	0.0593301	0.553373	0.337765
Igfbp5	Insulin-like growth factor-binding protein 5 Precursor (IGF-binding protein 5)(IGFBP-5)(IBP-5) [Source:UniProtKB/Swiss-Prot;Acc:Q07079]	-5.75215	-1.15741	0.120949	0.309634	0.900064	0.110672
Iqgap1	Ras GTPase-activating-like protein IQGAP1 [Source:UniProtKB/Swiss-Prot;Acc:Q9JKF1]	-1.09239	-1.89747	0.652569	0.271925	0.570947	0.0579534
Lefty2	Left-right determination factor 2 Precursor (Protein lefty-2)(Left-right determination factor B)(Protein lefty-B) [Source:UniProtKB/Swiss-Prot;Acc:P57785]	2.29504	1.00343	1.87229	0.101423	0.414996	0.263602
Map2k1	Dual specificity mitogen-activated protein kinase kinase 1 (MAP kinase kinase 1)(MAPKK 1)(EC 2.7.12.2)(ERK activator kinase 1)(MAPK/ERK kinase 1)(MEK1) [Source:UniProtKB/Swiss-Prot;Acc:P31938]	-1.0125	-1.01774	0.186088	0.533374	0.655687	0.0370925
Map2k6	Dual specificity mitogen-activated protein kinase kinase 6 (MAP kinase kinase 6)(MAPKK 6)(EC 2.7.12.2)(MAPK/ERK kinase 6)(SAPKK3) [Source:UniProtKB/Swiss-Prot;Acc:P70236]	-1.14041	-1.07758	0.190432	0.0466905	0.28578	0.471937
Ppp2r4	Serine/threonine-protein phosphatase 2A regulatory subunit B' (PP2A, subunit B', PR53 isoform)(Phosphotyrosyl phosphatase activator)(PTPA) [Source:UniProtKB/Swiss-Prot;Acc:P58389]	-1.7219	-1.33342	0.382117	0.253935	0.30688	0.757278
Rps6ka1	Ribosomal protein S6 kinase alpha-1 (S6K-alpha 1)(EC 2.7.11.1)(90 kDa ribosomal protein S6 kinase 1)(p90-RSK 1)(Ribosomal S6 kinase 1)(RSK-1)(pp90RSK1)(p90S6K)(MAP kinase-activated protein kinase 1a)(MAPKAPK1A) [Source:UniProtKB/Swiss-Prot;Acc:P18653]	-1.05713	-1.24442	0.568857	0.322059	0.997081	0.294609
Serpine1	Plasminogen activator inhibitor 1 Precursor (PAI-1)(PAI)(Endothelial plasminogen activator inhibitor) [Source:UniProtKB/Swiss-Prot;Acc:P22777]	-1.2529	1.07122	0.244117	0.0300952	0.469922	0.130762
Smad7	Mothers against decapentaplegic homolog 7 (Mothers against DPP homolog 7)(SMAD 7)(Smad7)(Madh8) [Source:UniProtKB/Swiss-Prot;Acc:O35253]	-2.54626	1.07342	0.328907	0.0821281	0.395412	0.350243
Atf2	Cyclic AMP-dependent transcription factor ATF-2 (cAMP-dependent transcription factor ATF-2)(Activating transcription factor 2)(cAMP response element-binding protein CRE-BP1)(MXBP protein) [Source:UniProtKB/Swiss-Prot;Acc:P16951]	1.00567	1.06348	0.0441583	0.0746313	0.95518	0.905809
Bad	Bcl2 antagonist of cell death (BAD)(Bcl-2-binding component 6)(Bcl-xL/Bcl-2-associated death promoter) [Source:UniProtKB/Swiss-Prot;Acc:Q61337]	4.15496	1.18241	4.54541	0.134521	0.555658	0.381321
Cdkn1a	Cyclin-dependent kinase inhibitor 1 (p21)(CDK-interacting protein 1)(Melanoma differentiation-associated protein) [Source:UniProtKB/Swiss-Prot;Acc:P39689]	1.5357	-1.01417	1.39921	0.10778	0.930102	0.0808815
Cdkn2b	Cyclin-dependent kinase 4 inhibitor B (p14-INK4b)(p15-INK4b) [Source:UniProtKB/Swiss-Prot;Acc:P55271]	-2.5232	1.05232	0.338592	0.0203347	0.126828	0.368616
Ckm	Creatine kinase M-type (EC 2.7.3.2)(Creatine kinase M chain)(M-CK) [Source:UniProtKB/Swiss-Prot;Acc:P07310]	1.46847	1.00566	0.722956	0.0648824	0.908159	0.0433388
Dusp1	Dual specificity protein phosphatase 1 (EC 3.1.3.48)(EC 3.1.3.16)(MAP kinase phosphatase 1)(MKP-1)(Protein-tyrosine phosphatase 3CH134)(Protein-tyrosine phosphatase ERP) [Source:UniProtKB/Swiss-Prot;Acc:P28563]	-1.43819	1.18147	0.0985512	0.0840983	0.0839847	0.325193
Ikbke	Inhibitor of nuclear factor kappa-B kinase subunit epsilon (I kappa-B kinase epsilon)(IkBKE)(IKK-epsilon)(IKK-E)(EC 2.7.11.10)(Inducible I kappa-B kinase)(IKK-i) [Source:UniProtKB/Swiss-Prot;Acc:Q9R0T8]	-1.19702	-1.19919	0.237107	0.229587	0.667835	0.165197
Itgb5	Integrin beta-5 Precursor [Source:UniProtKB/Swiss-Prot;Acc:O70309]	-1.34401	-1.6284	0.916904	0.199333	0.260718	0.00272631
Jun	Transcription factor AP-1 (Activator protein 1)(AP1)(Proto-oncogene c-jun)(V-jun avian sarcoma virus 17 oncogene homolog)(Jun A)(AH119) [Source:UniProtKB/Swiss-Prot;Acc:P05627]	-1.38393	1.24796	0.952268	0.160835	0.652207	0.626431
Junb	Transcription factor jun-B (MyD21) [Source:UniProtKB/Swiss-Prot;Acc:P09450]	-1.43309	1.87127	0.934956	0.432471	0.982657	0.956665
Map2k2	Dual specificity mitogen-activated protein kinase kinase 2 (MAP kinase kinase 2)(MAPKK 2)(EC 2.7.12.2)(ERK activator kinase 2)(MAPK/ERK kinase 2)(MEK2) [Source:UniProtKB/Swiss-Prot;Acc:Q63932]	-1.04107	-1.37445	1.47703	0.387928	0.224081	0.372267
Map2k3	Dual specificity mitogen-activated protein kinase kinase 3 (MAP kinase kinase 3)(MAPKK 3)(EC 2.7.12.2)(MAPK/ERK kinase 3) [Source:UniProtKB/Swiss-Prot;Acc:O09110]	-2.24794	1.0405	0.464362	0.348187	0.353835	0.487344
Map2k4	Dual specificity mitogen-activated protein kinase kinase 4 (MAP kinase kinase 4)(MAPKK 4)(EC 2.7.12.2)(MAPK/ERK kinase 4)(JNK-activating kinase 1)(C-JUN N-terminal kinase kinase 1)(JNK kinase 1)(JNKK 1)(SAPK/ERK kinase 1)(SEK1) [Source:UniProtKB/Swiss-Prot;Acc:P47809]	-1.05378	-1.0384	0.0908184	0.0222131	0.304805	0.805571
Mapk14	Mitogen-activated protein kinase 14 (EC 2.7.11.24)(Mitogen-activated protein kinase p38 alpha)(MAP kinase p38 alpha)(CRK1) [Source:UniProtKB/Swiss-Prot;Acc:P47811]	1.06459	-1.05161	0.072838	0.0943043	0.899439	0.432324
Mapk3	Mitogen-activated protein kinase 3 (EC 2.7.11.24)(Extracellular signal-regulated kinase 1)(ERK-1)(Insulin-stimulated MAP2 kinase)(MAP kinase 1)(MAPK 1)(p44-ERK1)(ERT2)(p44-MAPK)(Microtubule-associated protein 2 kinase)(MNK1) [Source:UniProtKB/Swiss-Prot;Acc:Q63844]	1.08265	1.10983	1.62436	0.201034	0.904512	0.420836
Mmp2	72 kDa type IV collagenase Precursor (EC 3.4.24.24)(72 kDa gelatinase)(Matrix metalloproteinase-2)(MMP-2)(Gelatinase A) [Source:UniProtKB/Swiss-Prot;Acc:P33434]	-1.85435	-1.31997	0.553707	0.242308	0.292787	0.441555
Myod1	Myoblast determination protein 1 [Source:UniProtKB/Swiss-Prot;Acc:P10085]	1.11952	1.04932	0.138614	0.0649921	0.540653	0.45633
Rhob	Rho-related GTP-binding protein RhoB Precursor [Source:UniProtKB/Swiss-Prot;Acc:P62746]	-1.06792	1.00316	0.125183	0.0396787	0.964863	0.727021
Runx2	Runt-related transcription factor 2 (Core-binding factor subunit alpha-1)(CBF-alpha-1)(Acute myeloid leukemia 3 protein)(Oncogene AML-3)(Polyomavirus enhancer-binding protein 2 alpha A subunit)(PEBP2-alpha A)(PEA2-alpha A)(SL3-3 enhancer factor 1 alpha A subunit)(SL3/AKV core-binding factor alpha A subunit)(Osteoblast-specific transcription factor 2)(OSF-2) [Source:UniProtKB/Swiss-Prot;Acc:Q08775]	-1.07937	1.14229	0.154489	0.160793	0.761898	0.72098
Smad4	Mothers against decapentaplegic homolog 4 (Mothers against DPP homolog 4)(SMAD 4)(Smad4)(Deletion target in pancreatic carcinoma 4 homolog) [Source:UniProtKB/Swiss-Prot;Acc:P97471]	-1.07127	1.05404	1.14512	0.388353	0.901471	0.504615
Sp1	Transcription factor Sp1 [Source:UniProtKB/Swiss-Prot;Acc:O89090]	1.01769	1.18201	0.768186	0.192735	0.823468	0.480927
Sp3	Transcription factor Sp3 [Source:UniProtKB/Swiss-Prot;Acc:O70494]	1.03475	1.07279	0.0793389	0.0369717	0.0492576	0.751479
Akt1	RAC-alpha serine/threonine-protein kinase (EC 2.7.11.1)(RAC-PK-alpha)(AKT1 kinase)(C-AKT)(Protein kinase B)(PKB)(Thymoma viral proto-oncogene) [Source:UniProtKB/Swiss-Prot;Acc:P31750]	1.09115	-1.09456	0.0796592	0.102268	0.379037	0.00723133
Acan	Aggrecan core protein Precursor (Cartilage-specific proteoglycan core protein)(CSPCP) [Source:UniProtKB/Swiss-Prot;Acc:Q61282]	-1.80676	1.01308	0.326015	0.160772	0.375259	0.649684
TNF Signaling Pathway
Gene symbol	Gene description	FC_Colonic tissue	FC_Spleen	SD_Colonic tissue	SD_Spleen	p-value_Colonic tissue	p-value_Spleen
Bcl3	B-cell lymphoma 3-encoded protein homolog (Protein Bcl-3) [Source:UniProtKB/Swiss-Prot;Acc:Q9Z2F6]	-1.2526	1.39944	0.491188	0.115186	0.851137	0.886534
Casp4	Caspase-4 Precursor (CASP-4)(EC 3.4.22.64)(Caspase-11)(CASP-11)(ICH-3 protease) [Contains Caspase-4 subunit p10;Caspase-4 subunit p20] [Source:UniProtKB/Swiss-Prot;Acc:P70343]	1.49506	1.9441	0.484977	0.746194	0.3608	0.875834
Ccl2	C-C motif chemokine 2 Precursor (Small-inducible cytokine A2)(Monocyte chemoattractant protein 1)(Monocyte chemotactic protein 1)(MCP-1)(Platelet-derived growth factor-inducible protein JE) [Source:UniProtKB/Swiss-Prot;Acc:P10148]	1.29112	1.04486	0.522013	0.0034669	0.407399	0.748737
Cdh2	Cadherin-2 Precursor (Neural cadherin)(N-cadherin)(CD325 antigen) [Source:UniProtKB/Swiss-Prot;Acc:P15116]	2.72334	1.00167	2.3585	0.0343172	0.406851	0.944536
Egr1	Early growth response protein 1 (EGR-1)(Protein Krox-24)(Transcription factor Zif268)(Nerve growth factor-induced protein A)(NGFI-A) [Source:UniProtKB/Swiss-Prot;Acc:P08046]	1.00241	1.05047	0.0345672	0.290837	0.430178	0.765423
Fosl1	Fos-related antigen 1 (FRA-1) [Source:UniProtKB/Swiss-Prot;Acc:P48755]	1.0013	1.01025	0.347237	0.039222	0.281909	0.479551
Adipoq	Adiponectin Precursor (Adipocyte, C1q and collagen domain-containing protein)(30 kDa adipocyte complement-related protein)(Adipocyte complement-related 30 kDa protein)(ACRP30)(Adipocyte-specific protein AdipoQ) [Source:UniProtKB/Swiss-Prot;Acc:Q60994]	1.45836	1.0363	0.95699	0.0476935	0.680037	0.570341
Ins1	Insulin-1 Precursor [Contains Insulin-1 B chain;Insulin-1 A chain] [Source:UniProtKB/Swiss-Prot;Acc:P01325]	1.1389	-1.04132	0.197816	0.0294784	0.638835	0.796367
Lbp	Lipopolysaccharide-binding protein Precursor (LBP) [Source:UniProtKB/Swiss-Prot;Acc:Q61805]	-1.0484	-1.23874	0.0473695	0.216305	0.440236	0.462207
Lipe	Hormone-sensitive lipase (HSL)(EC 3.1.1.79) [Source:UniProtKB/Swiss-Prot;Acc:P54310]	-1.03183	1.0475	0.135643	0.155977	0.56154	0.496024
Mapk3	Mitogen-activated protein kinase 3 (EC 2.7.11.24)(Extracellular signal-regulated kinase 1)(ERK-1)(Insulin-stimulated MAP2 kinase)(MAP kinase 1)(MAPK 1)(p44-ERK1)(ERT2)(p44-MAPK)(Microtubule-associated protein 2 kinase)(MNK1) [Source:UniProtKB/Swiss-Prot;Acc:Q63844]	1.08265	1.10983	1.62436	0.201034	0.904512	0.420836
Akt1	RAC-alpha serine/threonine-protein kinase (EC 2.7.11.1)(RAC-PK-alpha)(AKT1 kinase)(C-AKT)(Protein kinase B)(PKB)(Thymoma viral proto-oncogene) [Source:UniProtKB/Swiss-Prot;Acc:P31750]	1.09115	-1.09456	0.0796592	0.102268	0.379037	0.00723133
Nfkb1	Nuclear factor NF-kappa-B p105 subunit (DNA-binding factor KBF1)(EBP-1)(NF-kappa-B1 p84/NF-kappa-B1 p98) [Contains Nuclear factor NF-kappa-B p50 subunit] [Source:UniProtKB/Swiss-Prot;Acc:P25799]	-1.25329	-1.11876	0.554502	0.237395	0.332152	0.61692
Plau	Urokinase-type plasminogen activator Precursor (U-plasminogen activator)(uPA)(EC 3.4.21.73) [Contains Urokinase-type plasminogen activator long chain A;Urokinase-type plasminogen activator short chain A;Urokinase-type plasminogen activator chain B] [Source:UniProtKB/Swiss-Prot;Acc:P06869]	-1.48413	1.13492	0.0652583	0.121676	0.250684	0.00608332
Serpine1	Plasminogen activator inhibitor 1 Precursor (PAI-1)(PAI)(Endothelial plasminogen activator inhibitor) [Source:UniProtKB/Swiss-Prot;Acc:P22777]	-1.2529	1.07122	0.244117	0.0300952	0.469922	0.130762
Tnfrsf11b	Tumor necrosis factor receptor superfamily member 11B Precursor (Osteoprotegerin)(Osteoclastogenesis inhibitory factor) [Source:UniProtKB/Swiss-Prot;Acc:O08712]	-1.76629	-1.05828	0.446765	0.0659726	0.978659	0.223251
Ctnnb1	Catenin beta-1 (Beta-catenin) [Source:UniProtKB/Swiss-Prot;Acc:Q02248]	-3.16773	-1.06036	0.247164	0.0912403	0.0562968	0.416722
Adm	ADM Precursor [Contains Adrenomedullin(AM);Proadrenomedullin N-20 terminal peptide(ProAM N-terminal 20 peptide)(ProAM-N20)(PAMP)] [Source:UniProtKB/Swiss-Prot;Acc:P97297]	1.00737	1.22665	0.451598	0.468377	0.894614	0.0978764
Fas	Tumor necrosis factor receptor superfamily member 6 Precursor (FASLG receptor)(Apoptosis-mediating surface antigen FAS)(Apo-1 antigen)(CD95 antigen) [Source:UniProtKB/Swiss-Prot;Acc:P25446]	1.14136	1.1058	0.29754	0.0600413	0.887274	0.090068
Casp1	Caspase-1 Precursor (CASP-1)(EC 3.4.22.36)(Interleukin-1 beta convertase)(IL-1BC)(Interleukin-1 beta-converting enzyme)(IL-1 beta-converting enzyme)(ICE)(p45) [Contains Caspase-1 subunit p20;Caspase-1 subunit p10] [Source:UniProtKB/Swiss-Prot;Acc:P29452]	1.33372	1.51414	0.758808	0.359077	0.469528	0.365858
Casp3	Caspase-3 Precursor (CASP-3)(EC 3.4.22.56)(Apopain)(Cysteine protease CPP32)(CPP-32)(Yama protein)(SREBP cleavage activity 1)(SCA-1)(LICE) [Contains Caspase-3 subunit p17;Caspase-3 subunit p12] [Source:UniProtKB/Swiss-Prot;Acc:P70677]	1.46832	-1.06822	0.388944	0.109865	0.478781	0.693083
Ripk1	Receptor-interacting serine/threonine-protein kinase 1 (EC 2.7.11.1)(Serine/threonine-protein kinase RIP)(Cell death protein RIP)(Receptor-interacting protein) [Source:UniProtKB/Swiss-Prot;Acc:Q60855]	-1.38661	-1.03167	0.229834	0.0666637	0.560414	0.450167
Cebpa	CCAAT/enhancer-binding protein alpha (C/EBP alpha) [Source:UniProtKB/Swiss-Prot;Acc:P53566]	1.07587	-1.27973	0.495565	0.161237	0.629743	0.111559
Csf1	Macrophage colony-stimulating factor 1 Precursor (CSF-1)(MCSF) [Contains Processed macrophage colony-stimulating factor 1] [Source:UniProtKB/Swiss-Prot;Acc:P07141]	2.09333	-1.79366	1.07761	0.325143	0.283744	0.433627
Csnk2a2	Casein kinase II subunit alpha' (CK II)(EC 2.7.11.1) [Source:UniProtKB/Swiss-Prot;Acc:O54833]	-1.13028	-1.4738	0.818776	0.41612	0.938585	0.306359
En1	Homeobox protein engrailed-1 (Mo-En-1) [Source:UniProtKB/Swiss-Prot;Acc:P09065]	-1.11231	-1.02259	0.0726757	0.0296622	0.528128	0.604276
Foxc2	Forkhead box protein C2 (Forkhead-related protein FKHL14)(Transcription factor FKH-14)(Mesenchyme fork head protein 1)(MFH-1 protein) [Source:UniProtKB/Swiss-Prot;Acc:Q61850]	1.07607	-1.09963	0.176591	0.0521281	0.542888	0.573461
Hmga2	High mobility group protein HMGI-C (High mobility group AT-hook protein 2) [Source:UniProtKB/Swiss-Prot;Acc:P52927]	-1.29475	-1.01895	0.216729	0.0482967	0.390303	0.419017
Ikbke	Inhibitor of nuclear factor kappa-B kinase subunit epsilon (I kappa-B kinase epsilon)(IkBKE)(IKK-epsilon)(IKK-E)(EC 2.7.11.10)(Inducible I kappa-B kinase)(IKK-i) [Source:UniProtKB/Swiss-Prot;Acc:Q9R0T8]	-1.19702	-1.19919	0.237107	0.229587	0.667835	0.165197
Il1r1	Interleukin-1 receptor type I Precursor (IL-1R-1)(p80)(CD121 antigen-like family member A)(CD121a antigen) [Source:UniProtKB/Swiss-Prot;Acc:P13504]	1.54178	1.10955	0.683745	0.215271	0.348046	0.0772862
Il6	Interleukin-6 Precursor (IL-6)(Interleukin HP-1)(B-cell hybridoma growth factor) [Source:UniProtKB/Swiss-Prot;Acc:P08505]	-1.65715	1.12469	0.341082	0.277773	0.392998	0.73838
Insr	Insulin receptor Precursor (IR)(EC 2.7.10.1)(CD220 antigen) [Contains Insulin receptor subunit alpha;Insulin receptor subunit beta] [Source:UniProtKB/Swiss-Prot;Acc:P15208]	1.17372	1.02123	0.0659802	0.0362174	0.682074	0.179862
Irs1	Insulin receptor substrate 1 (IRS-1) [Source:UniProtKB/Swiss-Prot;Acc:P35569]	1.13431	1.01075	0.202399	0.0369462	0.98758	0.314172
Mapk1	Mitogen-activated protein kinase 1 (EC 2.7.11.24)(Extracellular signal-regulated kinase 2)(ERK-2)(Mitogen-activated protein kinase 2)(MAP kinase 2)(MAPK 2)(p42-MAPK)(ERT1) [Source:UniProtKB/Swiss-Prot;Acc:P63085]	1.62462	-1.39753	0.517039	0.291029	0.163504	0.520551
Mapk14	Mitogen-activated protein kinase 14 (EC 2.7.11.24)(Mitogen-activated protein kinase p38 alpha)(MAP kinase p38 alpha)(CRK1) [Source:UniProtKB/Swiss-Prot;Acc:P47811]	1.06459	-1.05161	0.072838	0.0943043	0.899439	0.432324
Mapk8	Mitogen-activated protein kinase 8 (EC 2.7.11.24)(Stress-activated protein kinase JNK1)(c-Jun N-terminal kinase 1) [Source:UniProtKB/Swiss-Prot;Acc:Q91Y86]	1.66258	1.05255	0.882626	0.0578773	0.426945	0.168836
Mapk9	Mitogen-activated protein kinase 9 (EC 2.7.11.24)(Stress-activated protein kinase JNK2)(c-Jun N-terminal kinase 2) [Source:UniProtKB/Swiss-Prot;Acc:Q9WTU6]	-1.01787	-1.53993	1.19489	0.22643	0.891054	0.128401
Mbp	Myelin basic protein (MBP)(Myelin A1 protein) [Source:UniProtKB/Swiss-Prot;Acc:P04370]	-1.10381	-1.05873	0.022345	0.0188715	0.00365749	0.762014
Mmp3	Stromelysin-1 Precursor (SL-1)(EC 3.4.24.17)(Matrix metalloproteinase-3)(MMP-3)(Transin-1)(EMS-2) [Source:UniProtKB/Swiss-Prot;Acc:P28862]	-1.35007	1.01271	0.152511	0.0141759	0.675565	0.444639
Nfkbia	NF-kappa-B inhibitor alpha (I-kappa-B-alpha)(IkappaBalpha)(IkB-alpha) [Source:UniProtKB/Swiss-Prot;Acc:Q9Z1E3]	1.00095	-1.05261	0.0944346	0.0653776	0.967544	0.462974
Nos2	Nitric oxide synthase, inducible (EC 1.14.13.39)(Inducible NO synthase)(Inducible NOS)(iNOS)(NOS type II)(Macrophage NOS)(MAC-NOS) [Source:UniProtKB/Swiss-Prot;Acc:P29477]	1.07177	1.00526	0.108645	0.0155323	0.553745	0.433822
Nr4a1	Nuclear receptor subfamily 4 group A member 1 (Orphan nuclear receptor HMR)(Nuclear hormone receptor NUR/77)(N10 nuclear protein) [Source:UniProtKB/Swiss-Prot;Acc:P12813]	-1.10274	1.24562	0.473311	0.413388	0.29575	0.672719
Pparg	Peroxisome proliferator-activated receptor gamma (PPAR-gamma)(Nuclear receptor subfamily 1 group C member 3) [Source:UniProtKB/Swiss-Prot;Acc:P37238]	-1.25199	-1.25809	1.01064	0.535455	0.432899	0.101097
Rela	Transcription factor p65 (Nuclear factor NF-kappa-B p65 subunit) [Source:UniProtKB/Swiss-Prot;Acc:Q04207]	1.73816	-1.25723	2.10548	0.0963272	0.495858	0.87241
Rxra	Retinoic acid receptor RXR-alpha (Retinoid X receptor alpha)(Nuclear receptor subfamily 2 group B member 1) [Source:UniProtKB/Swiss-Prot;Acc:P28700]	-1.04641	1.04448	0.0724956	0.0528599	0.24226	0.588579
Cd40	Tumor necrosis factor receptor superfamily member 5 Precursor (CD40L receptor)(B-cell surface antigen CD40)(Bp50)(CD40 antigen) [Source:UniProtKB/Swiss-Prot;Acc:P27512]	-1.06519	1.03484	0.100842	0.0582396	0.671141	0.205651
Slc2a1	Solute carrier family 2, facilitated glucose transporter member 1 (Glucose transporter type 1, erythrocyte/brain)(GLUT-1)(GT1) [Source:UniProtKB/Swiss-Prot;Acc:P17809]	-1.04374	-1.03032	0.0557588	0.0869552	0.014877	0.292397
Slc2a4	Solute carrier family 2, facilitated glucose transporter member 4 (Glucose transporter type 4, insulin-responsive)(GLUT-4)(GT2) [Source:UniProtKB/Swiss-Prot;Acc:P14142]	1.12998	1.04877	0.347418	0.145193	0.98727	0.876514
Sp1	Transcription factor Sp1 [Source:UniProtKB/Swiss-Prot;Acc:O89090]	1.01769	1.18201	0.768186	0.192735	0.823468	0.480927
Tgfb1	Transforming growth factor beta-1 Precursor (TGF-beta-1) [Contains Latency-associated peptide(LAP)] [Source:UniProtKB/Swiss-Prot;Acc:P04202]	-1.06116	-1.25618	0.0520643	0.186892	0.455685	0.386625
Tnf	Tumor necrosis factor Precursor (TNF-alpha)(Tumor necrosis factor ligand superfamily member 2)(TNF-a)(Cachectin) [Contains Tumor necrosis factor, membrane form;Tumor necrosis factor, soluble form] [Source:UniProtKB/Swiss-Prot;Acc:P06804]	-1.09467	1.01235	0.0744647	0.0316981	0.856612	0.674279
Tnfrsf1a	Tumor necrosis factor receptor superfamily member 1A Precursor (p60)(TNF-R1)(TNF-RI)(TNFR-I)(p55)(CD120a antigen) [Source:UniProtKB/Swiss-Prot;Acc:P25118]	1.0158	-1.21905	0.353397	0.192612	0.237197	0.677723
Tnfrsf1b	Tumor necrosis factor receptor superfamily member 1B Precursor (Tumor necrosis factor receptor 2)(TNF-R2)(Tumor necrosis factor receptor type II)(p75)(p80 TNF-alpha receptor)(CD120b antigen) [Source:UniProtKB/Swiss-Prot;Acc:P25119]	-1.48031	1.18446	0.244689	0.124693	0.982659	0.764185
Tnfsf11	Tumor necrosis factor ligand superfamily member 11 (Receptor activator of nuclear factor kappa B ligand)(RANKL)(TNF-related activation-induced cytokine)(TRANCE)(Osteoprotegerin ligand)(OPGL)(Osteoclast differentiation factor)(ODF)(CD254 antigen) [Contains Tumor necrosis factor ligand superfamily member 11, membrane form;Tumor necrosis factor ligand superfamily member 11, soluble form] [Source:Uni…	1.0084	1.13758	0.322317	0.493422	0.139661	0.76613
Abcc3	Canalicular multispecific organic anion transporter 2 (ATP-binding cassette sub-family C member 3)(Multidrug resistance-associated protein 3) [Source:UniProtKB/Swiss-Prot;Acc:B2RX12]	1.70215	1.03348	0.74897	0.227625	0.749919	0.680733
Acp5	Tartrate-resistant acid phosphatase type 5 Precursor (TR-AP)(EC 3.1.3.2)(Tartrate-resistant acid ATPase)(TrATPase)(Acid phosphatase 5, tartrate resistant) [Source:UniProtKB/Swiss-Prot;Acc:Q05117]	1.43864	1.15175	0.218307	0.329926	0.321231	0.923617
Casp12	Caspase-12 Precursor (CASP-12)(EC 3.4.22.-) [Source:UniProtKB/Swiss-Prot;Acc:O08736]	-1.05522	1.0918	0.113336	0.0497845	0.795811	0.0864542
Cish	Cytokine-inducible SH2-containing protein (CIS)(CIS-1)(Suppressor of cytokine signaling)(SOCS) [Source:UniProtKB/Swiss-Prot;Acc:Q62225]	-1.04001	-1.1259	0.616567	0.12538	0.925936	0.0997058
Cxcl1	Growth-regulated alpha protein Precursor (C-X-C motif chemokine 1)(Platelet-derived growth factor-inducible protein KC)(Secretory protein N51) [Contains KC(5-72)(KC-T)(Hematopoietic synergistic factor)(HSF)] [Source:UniProtKB/Swiss-Prot;Acc:P12850]	-1.40907	1.47318	0.642149	0.295814	0.148975	0.235934
Dffb	DNA fragmentation factor subunit beta (EC 3.-.-.-)(DNA fragmentation factor 40 kDa subunit)(DFF-40)(Caspase-activated deoxyribonuclease)(Caspase-activated DNase)(CAD) [Source:UniProtKB/Swiss-Prot;Acc:O54788]	1.42864	-1.01968	0.620237	0.0926428	0.439577	0.0265172
Fadd	Protein FADD (FAS-associated death domain protein)(FAS-associating death domain-containing protein)(Mediator of receptor induced toxicity) [Source:UniProtKB/Swiss-Prot;Acc:Q61160]	1.28627	-1.01616	0.456638	0.025863	0.625579	0.577622
Il11	Interleukin-11 Precursor (IL-11) [Source:UniProtKB/Swiss-Prot;Acc:P47873]	-1.84297	1.01152	0.541804	0.0750368	0.336197	0.278185
Madcam1	Mucosal addressin cell adhesion molecule 1 Precursor (MAdCAM-1)(mMAdCAM-1) [Source:UniProtKB/Swiss-Prot;Acc:Q61826]	-2.4228	1.30536	0.30929	0.384395	0.339504	0.0158859
Muc5ac	mucin 5, subtypes A and C, tracheobronchial/gastric [Source:RefSeq peptide;Acc:NP_034974]	158.996	1.00454	223.488	0.0654479	0.422481	0.658369
Nfkbib	NF-kappa-B inhibitor beta (NF-kappa-BIB)(I-kappa-B-beta)(IkappaBbeta)(IkB-beta)(IkB-B) [Source:UniProtKB/Swiss-Prot;Acc:Q60778]	-1.12627	1.08216	0.117907	0.0857985	0.253138	0.352129
Pros1	Vitamin K-dependent protein S Precursor [Source:UniProtKB/Swiss-Prot;Acc:Q08761]	-1.03955	-1.42824	0.149983	0.145596	0.377185	0.826721
Socs3	Suppressor of cytokine signaling 3 (SOCS-3)(Cytokine-inducible SH2 protein 3)(CIS-3)(Protein EF-10) [Source:UniProtKB/Swiss-Prot;Acc:O35718]	-1.84397	3.17668	0.598344	1.24715	0.976867	0.666552
Tnfrsf11a	Tumor necrosis factor receptor superfamily member 11A Precursor (Receptor activator of NF-KB)(Osteoclast differentiation factor receptor)(ODFR)(CD265 antigen) [Source:UniProtKB/Swiss-Prot;Acc:O35305]	1.05301	-1.03381	0.0565801	0.0704974	0.256444	0.346219
Tnfsf10	Tumor necrosis factor ligand superfamily member 10 (TNF-related apoptosis-inducing ligand)(Protein TRAIL)(CD253 antigen) [Source:UniProtKB/Swiss-Prot;Acc:P50592]	1.08791	-1.01323	0.0138133	0.134081	0.494472	0.978047
Abcc2	Canalicular multispecific organic anion transporter 1 (ATP-binding cassette sub-family C member 2) [Source:UniProtKB/Swiss-Prot;Acc:Q8VI47]	-1.14299	-1.00269	0.116277	0.0424668	0.383744	0.769623
Bcl2l1	Bcl-2-like protein 1 (Bcl2-L-1)(Apoptosis regulator Bcl-X) [Source:UniProtKB/Swiss-Prot;Acc:Q64373]	1.42271	1.02775	0.829069	0.0274075	0.435534	0.00511147
Bid	BH3-interacting domain death agonist (p22 BID)(BID) [Contains BH3-interacting domain death agonist p15(p15 BID);BH3-interacting domain death agonist p13(p13 BID);BH3-interacting domain death agonist p11(p11 BID)] [Source:UniProtKB/Swiss-Prot;Acc:P70444]	-3.31025	1.20751	0.289269	0.184961	0.386344	0.321906
Birc3	Baculoviral IAP repeat-containing protein 3 (Inhibitor of apoptosis protein 1)(MIAP-1)(MIAP1) [Source:UniProtKB/Swiss-Prot;Acc:O08863]	1.01368	-1.02401	0.131678	0.074626	0.703471	0.0326407
Casp7	Caspase-7 Precursor (CASP-7)(EC 3.4.22.60)(LICE2 cysteine protease)(Apoptotic protease Mch-3) [Contains Caspase-7 subunit p20;Caspase-7 subunit p11] [Source:UniProtKB/Swiss-Prot;Acc:P97864]	-1.49159	1.25326	0.375735	0.32701	0.403318	0.406973
Ccr1	C-C chemokine receptor type 1 (C-C CKR-1)(CC-CKR-1)(CCR-1)(CCR1)(Macrophage inflammatory protein 1-alpha receptor)(MIP-1alpha-R)(RANTES-R)(CD191 antigen) [Source:UniProtKB/Swiss-Prot;Acc:P51675]	-1.0745	-1.0165	0.115288	0.0664681	0.956182	0.970162
Ccr3	Probable C-C chemokine receptor type 3 (C-C CKR-3)(CC-CKR-3)(CCR-3)(CCR3)(CKR3)(Macrophage inflammatory protein 1-alpha receptor-like 2)(MIP-1 alpha RL2)(CD193 antigen) [Source:UniProtKB/Swiss-Prot;Acc:P51678]	1.33317	-1.61137	0.4667	0.128208	0.461265	0.0688824
Ccr5	C-C chemokine receptor type 5 (C-C CKR-5)(CC-CKR-5)(CCR-5)(MIP-1 alpha receptor)(CD195 antigen) [Source:UniProtKB/Swiss-Prot;Acc:P51682]	1.32677	-1.04562	0.472348	0.0304961	0.403852	0.82802
Ccr8	C-C chemokine receptor type 8 (C-C CKR-8)(CC-CKR-8)(CCR-8)(CDw198 antigen) [Source:UniProtKB/Swiss-Prot;Acc:P56484]	5.25876	-1.02669	5.85799	0.0479291	0.416644	0.372516
Cdkn1a	Cyclin-dependent kinase inhibitor 1 (p21)(CDK-interacting protein 1)(Melanoma differentiation-associated protein) [Source:UniProtKB/Swiss-Prot;Acc:P39689]	1.5357	-1.01417	1.39921	0.10778	0.930102	0.0808815
Cdkn1b	Cyclin-dependent kinase inhibitor 1B (Cyclin-dependent kinase inhibitor p27)(p27Kip1) [Source:UniProtKB/Swiss-Prot;Acc:P46414]	-1.06016	1.06667	0.0872156	0.0395109	0.885069	0.622099
Col2a1	Collagen alpha-1(II) chain Precursor (Alpha-1 type II collagen) [Contains Chondrocalcin] [Source:UniProtKB/Swiss-Prot;Acc:P28481]	1.05549	1.03444	0.0198066	0.0365576	0.749649	0.26236
Ctsb	Cathepsin B Precursor (EC 3.4.22.1)(Cathepsin B1) [Contains Cathepsin B light chain;Cathepsin B heavy chain] [Source:UniProtKB/Swiss-Prot;Acc:P10605]	-3.13522	-1.79881	0.278027	0.0272545	0.10797	0.0167699
Cxcl2	C-X-C motif chemokine 2 Precursor (Macrophage inflammatory protein 2)(MIP2) [Source:UniProtKB/Swiss-Prot;Acc:P10889]	-1.42005	-1.03558	0.252864	0.0143249	0.610069	0.0708693
Fap	Seprase (EC 3.4.21.-)(Fibroblast activation protein alpha)(Integral membrane serine protease) [Source:UniProtKB/Swiss-Prot;Acc:P97321]	1.03461	1.43482	0.0533253	0.593745	0.633258	0.342817
Fasn	Fatty acid synthase (EC 2.3.1.85) [Includes [Acyl-carrier-protein] S-acetyltransferase(EC 2.3.1.38);[Acyl-carrier-protein] S-malonyltransferase(EC 2.3.1.39);3-oxoacyl-[acyl-carrier-protein] synthase(EC 2.3.1.41);3-oxoacyl-[acyl-carrier-protein] reductase(EC 1.1.1.100);3-hydroxypalmitoyl-[acyl-carrier-protein] dehydratase(EC 4.2.1.61);Enoyl-[acyl-carrier-protein] reductase(EC 1.3.1.10);Oleoyl-[acy…	1.55977	-1.3952	1.8384	0.0730904	0.388328	0.571076
Fgr	Proto-oncogene tyrosine-protein kinase FGR (C-FGR)(EC 2.7.10.2)(P55-FGR) [Source:UniProtKB/Swiss-Prot;Acc:P14234]	1.08845	-1.03964	0.239956	0.0385987	0.732909	0.383782
Hck	Tyrosine-protein kinase HCK (EC 2.7.10.2)(Hemopoietic cell kinase)(p56-HCK/p59-HCK)(B-cell/myeloid kinase)(BMK) [Source:UniProtKB/Swiss-Prot;Acc:P08103]	-1.54971	1.01041	0.269909	0.094247	0.378364	0.495455
Icam1	Intercellular adhesion molecule 1 Precursor (ICAM-1)(MALA-2)(MyD10)(CD54 antigen) [Source:UniProtKB/Swiss-Prot;Acc:P13597]	-1.30726	1.19089	0.225261	0.250216	0.916989	0.380328
Ikbkb	Inhibitor of nuclear factor kappa-B kinase subunit beta (I-kappa-B-kinase beta)(IkBKB)(IKK-beta)(IKK-B)(EC 2.7.11.10)(I-kappa-B kinase 2)(IKK2)(Nuclear factor NF-kappa-B inhibitor kinase beta)(NFKBIKB) [Source:UniProtKB/Swiss-Prot;Acc:O88351]	-1.00214	-1.61209	0.394728	0.302657	0.0769546	0.114718
Il4	Interleukin-4 Precursor (IL-4)(B-cell stimulatory factor 1)(BSF-1)(Lymphocyte stimulatory factor 1)(IGG1 induction factor)(B-cell IgG differentiation factor)(B-cell growth factor 1) [Source:UniProtKB/Swiss-Prot;Acc:P07750]	1.00919	1.05759	0.048933	0.024408	0.338929	0.859972
Itgam	Integrin alpha-M Precursor (Cell surface glycoprotein MAC-1 subunit alpha)(CR-3 alpha chain)(Leukocyte adhesion receptor MO1)(CD11 antigen-like family member B)(CD11b antigen) [Source:UniProtKB/Swiss-Prot;Acc:P05555]	-1.30171	1.04494	0.137494	0.309986	0.572963	0.572204
Jun	Transcription factor AP-1 (Activator protein 1)(AP1)(Proto-oncogene c-jun)(V-jun avian sarcoma virus 17 oncogene homolog)(Jun A)(AH119) [Source:UniProtKB/Swiss-Prot;Acc:P05627]	-1.38393	1.24796	0.952268	0.160835	0.652207	0.626431
Ltf	Lactotransferrin Precursor (Lactoferrin)(EC 3.4.21.-) [Source:UniProtKB/Swiss-Prot;Acc:P08071]	-1.49195	-1.11505	0.239834	0.569219	0.36341	0.831068
Map2k1	Dual specificity mitogen-activated protein kinase kinase 1 (MAP kinase kinase 1)(MAPKK 1)(EC 2.7.12.2)(ERK activator kinase 1)(MAPK/ERK kinase 1)(MEK1) [Source:UniProtKB/Swiss-Prot;Acc:P31938]	-1.0125	-1.01774	0.186088	0.533374	0.655687	0.0370925
Map3k1	Mitogen-activated protein kinase kinase kinase 1 (EC 2.7.11.25)(MAPK/ERK kinase kinase 1)(MEK kinase 1)(MEKK 1) [Source:UniProtKB/Swiss-Prot;Acc:P53349]	1.22373	-1.32167	0.942919	0.346665	0.231556	0.728649
Map3k3	Mitogen-activated protein kinase kinase kinase 3 (EC 2.7.11.25)(MAPK/ERK kinase kinase 3)(MEK kinase 3)(MEKK 3) [Source:UniProtKB/Swiss-Prot;Acc:Q61084]	-1.0531	1	0.0559712	0.0477948	0.869137	0.925669
Mmp9	Matrix metalloproteinase-9 Precursor (MMP-9)(EC 3.4.24.35)(92 kDa type IV collagenase)(92 kDa gelatinase)(Gelatinase B)(GELB) [Source:UniProtKB/Swiss-Prot;Acc:P41245]	-1.20705	1.03955	0.190873	0.0535773	0.81344	0.473283
Muc2	Colonic mucin MUC2 Fragment [Source:UniProtKB/TrEMBL;Acc:Q9Z2U5]	1.08787	1.12624	0.300074	0.09261	0.953424	0.964831
Sell	L-selectin Precursor (Lymph node homing receptor)(Leukocyte adhesion molecule 1)(LAM-1)(Lymphocyte antigen 22)(Ly-22)(Lymphocyte surface MEL-14 antigen)(Leukocyte-endothelial cell adhesion molecule 1)(LECAM1)(CD62 antigen-like family member L)(CD62L antigen) [Source:UniProtKB/Swiss-Prot;Acc:P18337]	2.32864	2.57258	2.36512	1.84277	0.420389	0.548162
Slco1a4	Solute carrier organic anion transporter family member 1A4 (Solute carrier family 21 member 5)(Sodium-independent organic anion-transporting polypeptide 2) [Source:UniProtKB/Swiss-Prot;Acc:Q9EP96]	1.04472	-1.05496	0.0561664	0.0225962	0.469196	0.223521
Socs1	Suppressor of cytokine signaling 1 (SOCS-1)(JAK-binding protein)(JAB)(STAT-induced STAT inhibitor 1)(SSI-1) [Source:UniProtKB/Swiss-Prot;Acc:O35716]	-1.02279	1.147	0.0684702	0.239416	0.200851	0.101854
Socs2	Suppressor of cytokine signaling 2 (SOCS-2)(Cytokine-inducible SH2 protein 2)(CIS-2) [Source:UniProtKB/Swiss-Prot;Acc:O35717]	1.01205	1.0025	0.0668722	0.0405568	0.852983	0.295208
Sox9	Transcription factor SOX-9 [Source:UniProtKB/Swiss-Prot;Acc:Q04887]	-1.01062	1.35294	1.31608	0.274749	0.717133	0.409831
Src	Neuronal proto-oncogene tyrosine-protein kinase Src (EC 2.7.10.2)(pp60c-src)(p60-Src)(c-Src) [Source:UniProtKB/Swiss-Prot;Acc:P05480]	-2.67607	1.17558	0.325385	0.222197	0.459722	0.475578
Tradd	Tumor necrosis factor receptor type 1-associated DEATH domain protein (TNFR1-associated DEATH domain protein)(TNFRSF1A-associated via death domain) [Source:UniProtKB/Swiss-Prot;Acc:Q3U0V2]	-1.05508	-1.02474	0.430606	0.0747629	0.526215	0.325352
Traf2	TNF receptor-associated factor 2 [Source:UniProtKB/Swiss-Prot;Acc:P39429]	-1.01242	1.0129	0.0151453	0.0550177	0.0827534	0.96742
Traf5	TNF receptor-associated factor 5 [Source:UniProtKB/Swiss-Prot;Acc:P70191]	1.02837	-1.34201	0.0742035	0.125847	0.373647	0.0671106
Traf6	TNF receptor-associated factor 6 [Source:UniProtKB/Swiss-Prot;Acc:P70196]	-1.01486	1.00669	0.0456712	0.05793	0.554431	0.336641
B cell receptor signaling pathway
Gene symbol	Gene description	FC_Colonic tissue	FC_Spleen	SD_Colonic tissue	SD_Spleen	p-value_Colonic tissue	p-value_Spleen
Akt1	RAC-alpha serine/threonine-protein kinase (EC 2.7.11.1)(RAC-PK-alpha)(AKT1 kinase)(C-AKT)(Protein kinase B)(PKB)(Thymoma viral proto-oncogene) [Source:UniProtKB/Swiss-Prot;Acc:P31750]	1.09115	-1.09456	0.0796592	0.102268	0.379037	0.00723133
Akt2	RAC-beta serine/threonine-protein kinase (EC 2.7.11.1)(RAC-PK-beta)(Protein kinase Akt-2)(Protein kinase B, beta)(PKB beta) [Source:UniProtKB/Swiss-Prot;Acc:Q60823]	1.04045	-1.08301	0.0316705	0.0888059	0.394797	0.72303
Bcl10	B-cell lymphoma/leukemia 10 (B-cell CLL/lymphoma 10)(Bcl-10)(CED-3/ICH-1 prodomain homologous E10-like regulator)(mCIPER)(CARD-containing molecule enhancing NF-kappa-B)(Cellular homolog of vCARMEN)(cCARMEN)(Mammalian CARD-containing adapter molecule E10)(mE10)(Cellular-E10)(c-E10)(CARD-like apoptotic protein)(mCLAP) [Source:UniProtKB/Swiss-Prot;Acc:Q9Z0H7]	1.20569	-1.22945	0.904548	0.343082	0.241163	0.373493
Btk	Tyrosine-protein kinase BTK (EC 2.7.10.2)(Bruton tyrosine kinase)(Agammaglobulinaemia tyrosine kinase)(ATK)(B-cell progenitor kinase)(BPK)(Kinase EMB) [Source:UniProtKB/Swiss-Prot;Acc:P35991]	-1.06923	-1.26945	0.073171	0.145865	0.9143	0.191193
Cd19	B-lymphocyte antigen CD19 Precursor (Differentiation antigen CD19)(CD19 antigen) [Source:UniProtKB/Swiss-Prot;Acc:P25918]	-1.05279	1.6152	0.143495	0.311207	0.431083	0.848585
Cd22	B-cell receptor CD22 Precursor (Sialic acid-binding Ig-like lectin 2)(Siglec-2)(Leu-14)(B-lymphocyte cell adhesion molecule)(BL-CAM)(CD22 antigen) [Source:UniProtKB/Swiss-Prot;Acc:P35329]	-1.23687	-1.04548	0.232054	0.12895	0.398381	0.058618
Cd72	B-cell differentiation antigen CD72 (Lyb-2)(Lymphocyte antigen 32)(Ly-32)(CD72 antigen) [Source:UniProtKB/Swiss-Prot;Acc:P21855]	-1.09128	-1.51942	0.307337	0.459723	0.989602	0.129543
Chuk	Inhibitor of nuclear factor kappa-B kinase subunit alpha (I kappa-B kinase alpha)(IkBKA)(IKK-alpha)(IKK-A)(IkappaB kinase)(EC 2.7.11.10)(I-kappa-B kinase 1)(IKK1)(Conserved helix-loop-helix ubiquitous kinase)(Nuclear factor NF-kappa-B inhibitor kinase alpha)(NFKBIKA) [Source:UniProtKB/Swiss-Prot;Acc:Q60680]	-1.11343	-1.06779	0.150437	0.214191	0.298844	0.316585
Cr2	Complement receptor type 2 Precursor (Cr2)(Complement C3d receptor)(CD21 antigen) [Source:UniProtKB/Swiss-Prot;Acc:P19070]	2.27032	-1.06364	1.71714	0.262373	0.421587	0.119234
Fos	Proto-oncogene protein c-fos (Cellular oncogene fos) [Source:UniProtKB/Swiss-Prot;Acc:P01101]	-1.31645	1.5106	1.12509	0.27353	0.974241	0.931922
Hras1	GTPase HRas Precursor (Transforming protein p21)(p21ras)(H-Ras-1)(c-H-ras) [Contains GTPase HRas, N-terminally processed] [Source:UniProtKB/Swiss-Prot;Acc:Q61411]	1.38082	-1.43407	0.550748	0.21279	0.33526	0.0344806
Cd79b	B-cell antigen receptor complex-associated protein beta-chain Precursor (B-cell-specific glycoprotein B29)(Immunoglobulin-associated B29 protein)(IG-beta)(CD79b antigen) [Source:UniProtKB/Swiss-Prot;Acc:P15530]	1.22729	1.15728	0.297306	0.605021	0.861932	0.601009
Ikbkb	Inhibitor of nuclear factor kappa-B kinase subunit beta (I-kappa-B-kinase beta)(IkBKB)(IKK-beta)(IKK-B)(EC 2.7.11.10)(I-kappa-B kinase 2)(IKK2)(Nuclear factor NF-kappa-B inhibitor kinase beta)(NFKBIKB) [Source:UniProtKB/Swiss-Prot;Acc:O88351]	-1.00214	-1.61209	0.394728	0.302657	0.0769546	0.114718
Ikbkg	NF-kappa-B essential modulator (NEMO)(NF-kappa-B essential modifier)(Inhibitor of nuclear factor kappa-B kinase subunit gamma)(IkB kinase subunit gamma)(I-kappa-B kinase gamma)(IKK-gamma)(IKKG)(IkB kinase-associated protein 1)(IKKAP1)(mFIP-3) [Source:UniProtKB/Swiss-Prot;Acc:O88522]	-1.2733	-1.34546	0.28029	0.245728	0.670055	0.392422
Inpp5d	Phosphatidylinositol-3,4,5-trisphosphate 5-phosphatase 1 (EC 3.1.3.n1)(SH2 domain-containing inositol-5'-phosphatase 1)(SH2 domain-containing inositol phosphatase 1)(SHIP-1)(Inositol polyphosphate-5-phosphatase of 145 kDa)(SIP-145)(p150Ship) [Source:UniProtKB/Swiss-Prot;Acc:Q9ES52]	1.44304	-1.26541	0.663355	0.186988	0.353803	0.147005
Jun	Transcription factor AP-1 (Activator protein 1)(AP1)(Proto-oncogene c-jun)(V-jun avian sarcoma virus 17 oncogene homolog)(Jun A)(AH119) [Source:UniProtKB/Swiss-Prot;Acc:P05627]	-1.38393	1.24796	0.952268	0.160835	0.652207	0.626431
Kras	GTPase KRas Precursor (K-Ras 2)(Ki-Ras)(c-K-ras)(c-Ki-ras) [Contains GTPase KRas, N-terminally processed] [Source:UniProtKB/Swiss-Prot;Acc:P32883]	1.06309	-1.44425	0.464298	0.140068	0.392301	0.0363407
Blnk	B-cell linker protein (Cytoplasmic adapter protein)(B-cell adapter containing a SH2 domain protein)(B-cell adapter containing a Src homology 2 domain protein)(Src homology 2 domain-containing leukocyte protein of 65 kDa)(Slp-65)(Lymphocyte antigen 57) [Source:UniProtKB/Swiss-Prot;Acc:Q9QUN3]	-1.09441	1.18057	0.399535	0.373843	0.346112	0.45678
Lyn	Tyrosine-protein kinase Lyn (EC 2.7.10.2) [Source:UniProtKB/Swiss-Prot;Acc:P25911]	1.00394	-1.01789	0.0542071	0.017531	0.631339	0.485656
Nfatc1	Nuclear factor of activated T-cells, cytoplasmic 1 (NF-ATc1)(NFAT transcription complex cytosolic component)(NF-ATc)(NFATc) [Source:UniProtKB/Swiss-Prot;Acc:O88942]	3.02041	1.11013	2.46798	0.553527	0.343746	0.595503
Nfatc2	Nuclear factor of activated T-cells, cytoplasmic 2 (T-cell transcription factor NFAT1)(NFAT pre-existing subunit)(NF-ATp) [Source:UniProtKB/Swiss-Prot;Acc:Q60591]	-2.17579	-1.02096	0.34295	0.00430002	0.336264	0.444441
Nfatc3	Nuclear factor of activated T-cells, cytoplasmic 3 (NF-ATc3)(NFATc3)(T-cell transcription factor NFAT4)(NF-AT4)(NFATx) [Source:UniProtKB/Swiss-Prot;Acc:P97305]	1.67832	-1.2715	0.609227	0.300998	0.334133	0.00190302
Nfkb1	Nuclear factor NF-kappa-B p105 subunit (DNA-binding factor KBF1)(EBP-1)(NF-kappa-B1 p84/NF-kappa-B1 p98) [Contains Nuclear factor NF-kappa-B p50 subunit] [Source:UniProtKB/Swiss-Prot;Acc:P25799]	-1.25329	-1.11876	0.554502	0.237395	0.332152	0.61692
Nfkb2	Nuclear factor NF-kappa-B p100 subunit (DNA-binding factor KBF2) [Contains Nuclear factor NF-kappa-B p52 subunit] [Source:UniProtKB/Swiss-Prot;Acc:Q9WTK5]	-1.44082	1.57759	0.274751	0.772528	0.317407	0.190206
Nfkbib	NF-kappa-B inhibitor beta (NF-kappa-BIB)(I-kappa-B-beta)(IkappaBbeta)(IkB-beta)(IkB-B) [Source:UniProtKB/Swiss-Prot;Acc:Q60778]	-1.12627	1.08216	0.117907	0.0857985	0.253138	0.352129
Nfkbie	NF-kappa-B inhibitor epsilon (NF-kappa-BIE)(I-kappa-B-epsilon)(IkappaBepsilon)(IkB-epsilon)(IkB-E) [Source:UniProtKB/Swiss-Prot;Acc:O54910]	-1.0383	-1.16815	0.138929	0.37426	0.973318	0.28325
Nras	GTPase NRas Precursor (Transforming protein N-Ras) [Source:UniProtKB/Swiss-Prot;Acc:P08556]	-1.0291	-1.26127	0.614945	0.084761	0.889119	0.264401
Pik3ca	Phosphatidylinositol-4,5-bisphosphate 3-kinase catalytic subunit alpha isoform (EC 2.7.1.153)(PI3-kinase p110 subunit alpha)(PtdIns-3-kinase p110)(PI3K) [Source:UniProtKB/Swiss-Prot;Acc:P42337]	1.40568	-1.12181	0.667677	0.0423308	0.412142	0.190065
Pik3cd	Phosphatidylinositol-4,5-bisphosphate 3-kinase catalytic subunit delta isoform (EC 2.7.1.153)(PI3-kinase p110 subunit delta)(PtdIns-3-kinase p110)(PI3K)(p110delta) [Source:UniProtKB/Swiss-Prot;Acc:O35904]	1.4866	1.03579	1.92058	0.0617382	0.417994	0.985422
Pik3r1	Phosphatidylinositol 3-kinase regulatory subunit alpha (PI3-kinase p85 subunit alpha)(PtdIns-3-kinase p85-alpha)(PI3K) [Source:UniProtKB/Swiss-Prot;Acc:P26450]	-1.06493	-1.82633	0.702354	0.2598	0.791357	0.0664415
Lilrb3	paired-Ig-like receptor B [Source:RefSeq peptide;Acc:NP_035225]	1.05205	-1.10243	0.106719	0.0665571	0.974187	0.54534
Prkcb	Protein kinase C beta type (PKC-beta)(PKC-B)(EC 2.7.11.13) [Source:UniProtKB/Swiss-Prot;Acc:P68404]	-1.09463	1.1789	0.199779	0.508488	0.804297	0.282638
Ppp3cc	Serine/threonine-protein phosphatase 2B catalytic subunit gamma isoform (EC 3.1.3.16)(Calmodulin-dependent calcineurin A subunit gamma isoform)(Calcineurin, testis-specific catalytic subunit)(CAM-PRP catalytic subunit) [Source:UniProtKB/Swiss-Prot;Acc:P48455]	1.00407	1.37704	1.03692	0.564895	0.870515	0.422651
Rac1	Ras-related C3 botulinum toxin substrate 1 Precursor (p21-Rac1) [Source:UniProtKB/Swiss-Prot;Acc:P63001]	-3.31461	-1.07038	0.341161	0.177878	0.96906	0.567036
Syk	Tyrosine-protein kinase SYK (EC 2.7.10.2)(Spleen tyrosine kinase) [Source:UniProtKB/Swiss-Prot;Acc:P48025]	1.13391	1	0.219539	0.0567664	0.365496	0.260501
Vav1	Proto-oncogene vav (p95vav) [Source:UniProtKB/Swiss-Prot;Acc:P27870]	1.48807	-1.44844	0.85121	0.439396	0.302092	0.187932
Vav2	Guanine nucleotide exchange factor VAV2 (VAV-2) [Source:UniProtKB/Swiss-Prot;Acc:Q60992]	-1.01426	-1.17105	0.639859	0.346258	0.793749	0.116532
Plcg2	1-phosphatidylinositol-4,5-bisphosphate phosphodiesterase gamma-2 (EC 3.1.4.11)(Phosphoinositide phospholipase C)(Phospholipase C-gamma-2)(PLC-gamma-2) [Source:UniProtKB/Swiss-Prot;Acc:Q8CIH5]	-1.10053	1.02477	0.931903	0.331958	0.733524	0.23895
Akt3	RAC-gamma serine/threonine-protein kinase (EC 2.7.11.1)(RAC-PK-gamma)(Protein kinase Akt-3)(Protein kinase B, gamma)(PKB gamma) [Source:UniProtKB/Swiss-Prot;Acc:Q9WUA6]	-1.01225	1.04311	0.120519	0.0254903	0.963763	0.543696
Malt1	Mucosa-associated lymphoid tissue lymphoma translocation protein 1 homolog (EC 3.4.22.-)(Paracaspase) [Source:UniProtKB/Swiss-Prot;Acc:Q2TBA3]	1.06576	-1.02542	0.155765	0.0185811	0.431431	0.0127172
Pik3cg	Phosphatidylinositol-4,5-bisphosphate 3-kinase catalytic subunit gamma isoform (EC 2.7.1.153)(PI3-kinase p110 subunit gamma)(PtdIns-3-kinase subunit p110)(PI3Kgamma)(PI3K)(p120-PI3K) [Source:UniProtKB/Swiss-Prot;Acc:Q9JHG7]	1.46148	-1.28166	0.642941	0.277341	0.376049	0.178856
Pik3r5	Phosphoinositide 3-kinase regulatory subunit 5 (PI3-kinase regulatory subunit 5)(PI3-kinase p101 subunit)(PtdIns-3-kinase p101)(p101-PI3K)(Phosphatidylinositol-4,5-bisphosphate 3-kinase regulatory subunit)(PtdIns-3-kinase regulatory subunit) [Source:UniProtKB/Swiss-Prot;Acc:Q5SW28]	-1.01187	1	0.114316	0.0887981	0.754575	0.162228
1500003O03Rik	Calcium-binding protein p22 (Calcium-binding protein CHP)(Calcineurin homologous protein)(Sid 470) [Source:UniProtKB/Swiss-Prot;Acc:P61022]	1.16094	-1.25927	0.788555	0.168578	0.305665	0.433725
Ifitm1	interferon induced transmembrane protein 1 [Source:RefSeq peptide;Acc:NP_081096]	-1.60714	1.40571	0.381983	0.236082	0.191159	0.727845
Nfatc4	Nuclear factor of activated T-cells, cytoplasmic 4 (NF-ATc4)(NFATc4)(T-cell transcription factor NFAT3)(NF-AT3) [Source:UniProtKB/Swiss-Prot;Acc:Q8K120]	-1.30483	-1.10021	0.290961	0.101235	0.708133	0.000999736
Pik3cb	Phosphatidylinositol-4,5-bisphosphate 3-kinase catalytic subunit beta isoform (EC 2.7.1.153)(PI3-kinase p110 subunit beta)(PtdIns-3-kinase p110)(PI3Kbeta)(PI3K) [Source:UniProtKB/Swiss-Prot;Acc:Q8BTI9]	-1.06209	-1.28271	0.102409	0.0347644	0.932169	0.0670192
Card11	Caspase recruitment domain-containing protein 11 [Source:UniProtKB/Swiss-Prot;Acc:Q8CIS0]	-1.79521	1.00413	0.327574	0.123523	0.427329	0.00978865
Cd79a	B-cell antigen receptor complex-associated protein alpha-chain Precursor (IG-alpha)(MB-1 membrane glycoprotein)(Surface IgM-associated protein)(Membrane-bound immunoglobulin-associated protein)(CD79a antigen) [Source:UniProtKB/Swiss-Prot;Acc:P11911]	1.20397	1.87602	0.114026	0.181511	0.491655	0.992501
Cd81	CD81 antigen (26 kDa cell surface protein TAPA-1)(Target of the antiproliferative antibody 1)(CD81 antigen) [Source:UniProtKB/Swiss-Prot;Acc:P35762]	-1.39302	1.54929	0.491475	0.336037	0.794051	0.738362
Fcgr2b	Low affinity immunoglobulin gamma Fc region receptor II Precursor (IgG Fc receptor II beta)(Fc gamma receptor IIB)(Fc-gamma-RIIB)(Fc-gamma RII)(FcRII)(Lymphocyte antigen 17)(Ly-17)(CD32 antigen) [Source:UniProtKB/Swiss-Prot;Acc:P08101]	-1.36029	1.14647	0.4071	0.107403	0.858286	0.468728
Ptpn6	Tyrosine-protein phosphatase non-receptor type 6 (EC 3.1.3.48)(Protein-tyrosine phosphatase 1C)(PTP-1C)(Hematopoietic cell protein-tyrosine phosphatase)(70Z-SHP)(SH-PTP1)(SHP-1)(PTPTY-42) [Source:UniProtKB/Swiss-Prot;Acc:P29351]	-1.07164	-2.03532	0.403558	0.260474	0.809801	0.114376
Rac3	Ras-related C3 botulinum toxin substrate 3 Precursor (p21-Rac3) [Source:UniProtKB/Swiss-Prot;Acc:P60764]	1.01879	-1.03349	0.0345347	0.0158155	0.447097	0.194604
Nfkbia	NF-kappa-B inhibitor alpha (I-kappa-B-alpha)(IkappaBalpha)(IkB-alpha) [Source:UniProtKB/Swiss-Prot;Acc:Q9Z1E3]	1.00095	-1.05261	0.0944346	0.0653776	0.967544	0.462974
Pik3r2	Phosphatidylinositol 3-kinase regulatory subunit beta (PI3-kinase p85 subunit beta)(PtdIns-3-kinase p85-beta) [Source:UniProtKB/Swiss-Prot;Acc:O08908]	2.07688	1.04117	2.19115	0.0879784	0.283612	0.375425
Pik3r3	Phosphatidylinositol 3-kinase regulatory subunit gamma (PI3-kinase p85 subunit gamma)(PtdIns-3-kinase p85-gamma)(p55PIK) [Source:UniProtKB/Swiss-Prot;Acc:Q64143]	-1.51431	1.01702	0.0925939	0.0653766	0.193251	0.395638
Ppp3ca	Serine/threonine-protein phosphatase 2B catalytic subunit alpha isoform (EC 3.1.3.16)(Calmodulin-dependent calcineurin A subunit alpha isoform)(CAM-PRP catalytic subunit) [Source:UniProtKB/Swiss-Prot;Acc:P63328]	-1.04406	1.3979	1.29421	0.235106	0.483831	0.150587
Ppp3cb	Serine/threonine-protein phosphatase 2B catalytic subunit beta isoform (EC 3.1.3.16)(Calmodulin-dependent calcineurin A subunit beta isoform)(CAM-PRP catalytic subunit) [Source:UniProtKB/Swiss-Prot;Acc:P48453]	-1.03035	1.04185	0.0394349	0.0592451	0.608564	0.270792
Ppp3r1	Calcineurin subunit B type 1 (Protein phosphatase 2B regulatory subunit 1)(Protein phosphatase 3 regulatory subunit B alpha isoform 1) [Source:UniProtKB/Swiss-Prot;Acc:Q63810]	-1.02144	1.01892	0.0634301	0.105549	0.738288	0.0699909
Rac2	Ras-related C3 botulinum toxin substrate 2 Precursor (p21-Rac2)(EN-7 protein) [Source:UniProtKB/Swiss-Prot;Acc:Q05144]	-1.93983	1.3323	0.347292	0.246275	0.907008	0.582856
Rasgrp3	RAS, guanyl releasing protein 3 [Source:RefSeq peptide;Acc:NP_997129]	-1.17888	1.45469	0.350714	0.452144	0.369867	0.655637
Nfat5	Nuclear factor of activated T-cells 5 (NF-AT5)(T-cell transcription factor NFAT5)(Rel domain-containing transcription factor NFAT5) [Source:UniProtKB/Swiss-Prot;Acc:Q9WV30]	-4.7802	1.817	0.227378	2.06454	0.393042	0.6213
Gsk3b	Glycogen synthase kinase-3 beta (GSK-3 beta)(EC 2.7.11.26) [Source:UniProtKB/Swiss-Prot;Acc:Q9WV60]	1.00722	1.02053	0.610607	0.133572	0.761819	0.225335
Vav3	Guanine nucleotide exchange factor VAV3 (VAV-3) [Source:UniProtKB/Swiss-Prot;Acc:Q9R0C8]	1.28131	1.03417	0.508001	0.0354419	0.472644	0.0596028
Toll-like receptor signaling pathway
Gene symbol	Gene description	FC_Colonic tissue	FC_Spleen	SD_Colonic tissue	SD_Spleen	p-value_Colonic tissue	p-value_Spleen
Ticam1	TIR domain-containing adapter molecule 1 (TICAM-1)(Toll-interleukin 1 receptor domain-containing adapter protein inducing interferon-beta)(TIR domain-containing adapter protein inducing IFN-beta) [Source:UniProtKB/Swiss-Prot;Acc:Q80UF7]	1.0129	1.16171	0.447394	0.234987	0.953875	0.806119
Akt2	RAC-beta serine/threonine-protein kinase (EC 2.7.11.1)(RAC-PK-beta)(Protein kinase Akt-2)(Protein kinase B, beta)(PKB beta) [Source:UniProtKB/Swiss-Prot;Acc:Q60823]	1.04045	-1.08301	0.0316705	0.0888059	0.394797	0.72303
Tirap	Toll/interleukin-1 receptor domain-containing adapter protein (TIR domain-containing adapter protein)(MyD88 adapter-like protein)(Adaptor protein Wyatt) [Source:UniProtKB/Swiss-Prot;Acc:Q99JY1]	-1.16819	1.12856	0.283651	0.195911	0.889629	0.681239
Casp8	Caspase-8 Precursor (CASP-8)(EC 3.4.22.61) [Contains Caspase-8 subunit p18;Caspase-8 subunit p10] [Source:UniProtKB/Swiss-Prot;Acc:O89110]	-2.47855	1.16095	0.316007	0.0304678	0.356781	0.293879
Cd14	Monocyte differentiation antigen CD14 Precursor (Myeloid cell-specific leucine-rich glycoprotein)(CD14 antigen) [Source:UniProtKB/Swiss-Prot;Acc:P10810]	-3.99494	1.23356	0.250834	0.456153	0.523672	0.868206
Cd86	T-lymphocyte activation antigen CD86 Precursor (Activation B7-2 antigen)(Early T-cell costimulatory molecule 1)(ETC-1)(CD86 antigen) [Source:UniProtKB/Swiss-Prot;Acc:P42082]	1.23213	-1.01543	0.265279	0.250625	0.497599	0.623197
Chuk	Inhibitor of nuclear factor kappa-B kinase subunit alpha (I kappa-B kinase alpha)(IkBKA)(IKK-alpha)(IKK-A)(IkappaB kinase)(EC 2.7.11.10)(I-kappa-B kinase 1)(IKK1)(Conserved helix-loop-helix ubiquitous kinase)(Nuclear factor NF-kappa-B inhibitor kinase alpha)(NFKBIKA) [Source:UniProtKB/Swiss-Prot;Acc:Q60680]	-1.11343	-1.06779	0.150437	0.214191	0.298844	0.316585
Fadd	Protein FADD (FAS-associated death domain protein)(FAS-associating death domain-containing protein)(Mediator of receptor induced toxicity) [Source:UniProtKB/Swiss-Prot;Acc:Q61160]	1.28627	-1.01616	0.456638	0.025863	0.625579	0.577622
Fos	Proto-oncogene protein c-fos (Cellular oncogene fos) [Source:UniProtKB/Swiss-Prot;Acc:P01101]	-1.31645	1.5106	1.12509	0.27353	0.974241	0.931922
Tlr3	Toll-like receptor 3 Precursor (CD283 antigen) [Source:UniProtKB/Swiss-Prot;Acc:Q99MB1]	-1.09091	1.05987	0.063651	0.030694	0.823127	0.978734
Cxcl10	C-X-C motif chemokine 10 Precursor (Small-inducible cytokine B10)(Interferon-gamma-induced protein CRG-2)(Gamma-IP10)(IP-10)(C7) [Source:UniProtKB/Swiss-Prot;Acc:P17515]	-2.41156	1.95941	0.285199	0.96829	0.368586	0.0371894
Ifna4	Interferon alpha-4 Precursor [Source:UniProtKB/Swiss-Prot;Acc:P07351]	-1.26288	-1.01357	0.284001	0.0404549	0.296847	0.985884
Ifna5	Interferon alpha-5 Precursor [Source:UniProtKB/Swiss-Prot;Acc:P07349]	-2.11344	1.17531	0.343344	0.262706	0.368894	0.37937
Ifna6	Interferon alpha-6 Precursor (Interferon alpha-8) [Source:UniProtKB/Swiss-Prot;Acc:P07350]	1.04486	-1.05374	0.153529	0.0310983	0.83143	0.507543
Ifna7	interferon alpha 7 precursor [Source:RefSeq peptide;Acc:NP_032360]	-1.06718	-1.05652	0.0449577	0.0533962	0.0112984	0.940824
Ifna9	Interferon alpha-9 Precursor [Source:UniProtKB/Swiss-Prot;Acc:P09235]	-1.21698	-1.0464	0.256289	0.127332	0.453282	0.421899
Ifnar1	Interferon-alpha/beta receptor alpha chain Precursor (IFN-alpha-REC) [Source:UniProtKB/Swiss-Prot;Acc:P33896]	-1.04343	-1.03566	0.0214067	0.0630557	0.0608431	0.846237
Ifnar2	Interferon-alpha/beta receptor beta chain Precursor (Interferon alpha/beta receptor 2)(IFN-alpha-REC)(Type I interferon receptor)(IFN-R) [Source:UniProtKB/Swiss-Prot;Acc:O35664]	1.67201	1.07482	1.04162	0.00743717	0.43296	0.516564
Ifnb1	Interferon beta Precursor (IFN-beta) [Source:UniProtKB/Swiss-Prot;Acc:P01575]	-1.03051	1.01715	0.0856382	0.108063	0.657903	0.799056
Ikbkb	Inhibitor of nuclear factor kappa-B kinase subunit beta (I-kappa-B-kinase beta)(IkBKB)(IKK-beta)(IKK-B)(EC 2.7.11.10)(I-kappa-B kinase 2)(IKK2)(Nuclear factor NF-kappa-B inhibitor kinase beta)(NFKBIKB) [Source:UniProtKB/Swiss-Prot;Acc:O88351]	-1.00214	-1.61209	0.394728	0.302657	0.0769546	0.114718
Ikbkg	NF-kappa-B essential modulator (NEMO)(NF-kappa-B essential modifier)(Inhibitor of nuclear factor kappa-B kinase subunit gamma)(IkB kinase subunit gamma)(I-kappa-B kinase gamma)(IKK-gamma)(IKKG)(IkB kinase-associated protein 1)(IKKAP1)(mFIP-3) [Source:UniProtKB/Swiss-Prot;Acc:O88522]	-1.2733	-1.34546	0.28029	0.245728	0.670055	0.392422
Il12b	Interleukin-12 subunit beta Precursor (IL-12B)(IL-12 subunit p40)(Cytotoxic lymphocyte maturation factor 40 kDa subunit)(CLMF p40) [Source:UniProtKB/Swiss-Prot;Acc:P43432]	-1.42027	1.03538	0.311117	0.0447355	0.532507	0.378501
Il1b	Interleukin-1 beta Precursor (IL-1 beta) [Source:UniProtKB/Swiss-Prot;Acc:P10749]	-1.84255	1.25981	0.103641	0.301941	0.412433	0.373897
Irak1	Interleukin-1 receptor-associated kinase 1 (IRAK-1)(IRAK)(EC 2.7.11.1)(Pelle-like protein kinase)(mPLK) [Source:UniProtKB/Swiss-Prot;Acc:Q62406]	2.5602	1.49616	2.29058	0.229104	0.682941	0.0283199
Il6	Interleukin-6 Precursor (IL-6)(Interleukin HP-1)(B-cell hybridoma growth factor) [Source:UniProtKB/Swiss-Prot;Acc:P08505]	-1.65715	1.12469	0.341082	0.277773	0.392998	0.73838
Jun	Transcription factor AP-1 (Activator protein 1)(AP1)(Proto-oncogene c-jun)(V-jun avian sarcoma virus 17 oncogene homolog)(Jun A)(AH119) [Source:UniProtKB/Swiss-Prot;Acc:P05627]	-1.38393	1.24796	0.952268	0.160835	0.652207	0.626431
Lbp	Lipopolysaccharide-binding protein Precursor (LBP) [Source:UniProtKB/Swiss-Prot;Acc:Q61805]	-1.0484	-1.23874	0.0473695	0.216305	0.440236	0.462207
Tlr7	Toll-like receptor 7 Precursor [Source:UniProtKB/Swiss-Prot;Acc:P58681]	-1.11781	-1.29962	0.0765039	0.161785	0.870537	0.142093
Cxcl9	C-X-C motif chemokine 9 Precursor (Small-inducible cytokine B9)(Gamma-interferon-induced monokine)(MIG)(M119) [Source:UniProtKB/Swiss-Prot;Acc:P18340]	-1.08022	1.06558	0.393969	0.190502	0.733769	0.377212
Myd88	Myeloid differentiation primary response protein MyD88 [Source:UniProtKB/Swiss-Prot;Acc:P22366]	-1.39481	1.1683	0.405217	0.0857885	0.35685	0.0757836
Nfkb1	Nuclear factor NF-kappa-B p105 subunit (DNA-binding factor KBF1)(EBP-1)(NF-kappa-B1 p84/NF-kappa-B1 p98) [Contains Nuclear factor NF-kappa-B p50 subunit] [Source:UniProtKB/Swiss-Prot;Acc:P25799]	-1.25329	-1.11876	0.554502	0.237395	0.332152	0.61692
Nfkbia	NF-kappa-B inhibitor alpha (I-kappa-B-alpha)(IkappaBalpha)(IkB-alpha) [Source:UniProtKB/Swiss-Prot;Acc:Q9Z1E3]	1.00095	-1.05261	0.0944346	0.0653776	0.967544	0.462974
Pik3ca	Phosphatidylinositol-4,5-bisphosphate 3-kinase catalytic subunit alpha isoform (EC 2.7.1.153)(PI3-kinase p110 subunit alpha)(PtdIns-3-kinase p110)(PI3K) [Source:UniProtKB/Swiss-Prot;Acc:P42337]	1.40568	-1.12181	0.667677	0.0423308	0.412142	0.190065
Pik3cd	Phosphatidylinositol-4,5-bisphosphate 3-kinase catalytic subunit delta isoform (EC 2.7.1.153)(PI3-kinase p110 subunit delta)(PtdIns-3-kinase p110)(PI3K)(p110delta) [Source:UniProtKB/Swiss-Prot;Acc:O35904]	1.4866	1.03579	1.92058	0.0617382	0.417994	0.985422
Pik3r2	Phosphatidylinositol 3-kinase regulatory subunit beta (PI3-kinase p85 subunit beta)(PtdIns-3-kinase p85-beta) [Source:UniProtKB/Swiss-Prot;Acc:O08908]	2.07688	1.04117	2.19115	0.0879784	0.283612	0.375425
Pik3r3	Phosphatidylinositol 3-kinase regulatory subunit gamma (PI3-kinase p85 subunit gamma)(PtdIns-3-kinase p85-gamma)(p55PIK) [Source:UniProtKB/Swiss-Prot;Acc:Q64143]	-1.51431	1.01702	0.0925939	0.0653766	0.193251	0.395638
Mapk11	Mitogen-activated protein kinase 11 (EC 2.7.11.24)(Mitogen-activated protein kinase p38 beta)(MAP kinase p38 beta)(p38B) [Source:UniProtKB/Swiss-Prot;Acc:Q9WUI1]	2.65436	-1.01736	2.5081	0.100063	0.438801	0.0774263
Ccl3	C-C motif chemokine 3 Precursor (Small-inducible cytokine A3)(Macrophage inflammatory protein 1-alpha)(MIP-1-alpha)(TY-5)(SIS-alpha)(Heparin-binding chemotaxis protein)(L2G25B) [Source:UniProtKB/Swiss-Prot;Acc:P10855]	-1.33261	-1.05014	0.268583	0.00894599	0.362193	0.483785
Ccl4	C-C motif chemokine 4 Precursor (Small-inducible cytokine A4)(Macrophage inflammatory protein 1-beta)(MIP-1-beta)(Immune activation protein 2)(ACT-2)(ACT2)(Protein H400)(SIS-gamma) [Source:UniProtKB/Swiss-Prot;Acc:P14097]	-2.7339	-1.03452	0.0830326	0.138975	0.506026	0.263085
Ccl5	C-C motif chemokine 5 Precursor (Small-inducible cytokine A5)(T-cell-specific protein RANTES)(SIS-delta)(MuRantes) [Source:UniProtKB/Swiss-Prot;Acc:P30882]	-1.96486	1.18438	0.364917	0.297692	0.449962	0.458877
Stat1	Signal transducer and activator of transcription 1 [Source:UniProtKB/Swiss-Prot;Acc:P42225]	-1.09927	1.0164	0.0798351	0.0489832	0.189739	0.429167
Tlr1	Toll-like receptor 1 Precursor (Toll/interleukin-1 receptor-like protein)(TIL)(CD281 antigen) [Source:UniProtKB/Swiss-Prot;Acc:Q9EPQ1]	-1.10373	1.62088	0.820349	0.81385	0.471015	0.498338
Tlr4	Toll-like receptor 4 Precursor (CD284 antigen) [Source:UniProtKB/Swiss-Prot;Acc:Q9QUK6]	-1.03163	-1.11014	0.203469	0.0643627	0.575922	0.1915
Tnf	Tumor necrosis factor Precursor (TNF-alpha)(Tumor necrosis factor ligand superfamily member 2)(TNF-a)(Cachectin) [Contains Tumor necrosis factor, membrane form;Tumor necrosis factor, soluble form] [Source:UniProtKB/Swiss-Prot;Acc:P06804]	-1.09467	1.01235	0.0744647	0.0316981	0.856612	0.674279
Cd40	Tumor necrosis factor receptor superfamily member 5 Precursor (CD40L receptor)(B-cell surface antigen CD40)(Bp50)(CD40 antigen) [Source:UniProtKB/Swiss-Prot;Acc:P27512]	-1.06519	1.03484	0.100842	0.0582396	0.671141	0.205651
Ticam2	TIR domain-containing adapter molecule 2 (TICAM-2)(TRIF-related adapter molecule)(Toll/interleukin-1 receptor domain-containing protein) [Source:UniProtKB/Swiss-Prot;Acc:Q8BJQ4]	1.03173	1.10376	0.07086	0.340649	0.494133	0.737327
Ifna13	Interferon alpha-13 Precursor (IFN-alpha 13) [Source:UniProtKB/Swiss-Prot;Acc:Q80SU4]	1.10813	1.07323	0.141578	0.0383226	0.324654	0.871721
Akt3	RAC-gamma serine/threonine-protein kinase (EC 2.7.11.1)(RAC-PK-gamma)(Protein kinase Akt-3)(Protein kinase B, gamma)(PKB gamma) [Source:UniProtKB/Swiss-Prot;Acc:Q9WUA6]	-1.01225	1.04311	0.120519	0.0254903	0.963763	0.543696
Tlr2	Toll-like receptor 2 Precursor (CD282 antigen) [Source:UniProtKB/Swiss-Prot;Acc:Q9QUN7]	1.07899	-1.00439	0.069451	0.0141488	0.0461829	0.568822
Ifna12	Interferon alpha-12 Precursor (IFN-alpha 12) [Source:UniProtKB/Swiss-Prot;Acc:Q80SS5]	-1.18342	1.14966	0.280367	0.21282	0.54466	0.450745
Map2k3	Dual specificity mitogen-activated protein kinase kinase 3 (MAP kinase kinase 3)(MAPKK 3)(EC 2.7.12.2)(MAPK/ERK kinase 3) [Source:UniProtKB/Swiss-Prot;Acc:O09110]	-2.24794	1.0405	0.464362	0.348187	0.353835	0.487344
Map2k4	Dual specificity mitogen-activated protein kinase kinase 4 (MAP kinase kinase 4)(MAPKK 4)(EC 2.7.12.2)(MAPK/ERK kinase 4)(JNK-activating kinase 1)(C-JUN N-terminal kinase kinase 1)(JNK kinase 1)(JNKK 1)(SAPK/ERK kinase 1)(SEK1) [Source:UniProtKB/Swiss-Prot;Acc:P47809]	-1.05378	-1.0384	0.0908184	0.0222131	0.304805	0.805571
Map2k6	Dual specificity mitogen-activated protein kinase kinase 6 (MAP kinase kinase 6)(MAPKK 6)(EC 2.7.12.2)(MAPK/ERK kinase 6)(SAPKK3) [Source:UniProtKB/Swiss-Prot;Acc:P70236]	-1.14041	-1.07758	0.190432	0.0466905	0.28578	0.471937
Map3k7	Mitogen-activated protein kinase kinase kinase 7 (EC 2.7.11.25)(Transforming growth factor-beta-activated kinase 1)(TGF-beta-activated kinase 1) [Source:UniProtKB/Swiss-Prot;Acc:Q62073]	-1.0812	1.05697	0.0939983	0.0677227	0.494213	0.931431
Mapk10	Mitogen-activated protein kinase 10 (EC 2.7.11.24)(Stress-activated protein kinase JNK3)(c-Jun N-terminal kinase 3)(MAP kinase p49 3F12) [Source:UniProtKB/Swiss-Prot;Acc:Q61831]	-1.78463	1.07074	0.348802	0.0724079	0.427796	0.0166818
Mapk13	Mitogen-activated protein kinase 13 (EC 2.7.11.24)(Stress-activated protein kinase 4)(Mitogen-activated protein kinase p38 delta)(MAP kinase p38 delta) [Source:UniProtKB/Swiss-Prot;Acc:Q9Z1B7]	1.46129	-1.26476	2.34677	0.14346	0.966377	0.426392
Mapk14	Mitogen-activated protein kinase 14 (EC 2.7.11.24)(Mitogen-activated protein kinase p38 alpha)(MAP kinase p38 alpha)(CRK1) [Source:UniProtKB/Swiss-Prot;Acc:P47811]	1.06459	-1.05161	0.072838	0.0943043	0.899439	0.432324
Mapk9	Mitogen-activated protein kinase 9 (EC 2.7.11.24)(Stress-activated protein kinase JNK2)(c-Jun N-terminal kinase 2) [Source:UniProtKB/Swiss-Prot;Acc:Q9WTU6]	-1.01787	-1.53993	1.19489	0.22643	0.891054	0.128401
Irak4	Interleukin-1 receptor-associated kinase 4 (IRAK-4)(EC 2.7.11.1) [Source:UniProtKB/Swiss-Prot;Acc:Q8R4K2]	-1.27282	-1.27746	0.119716	0.0519601	0.795863	0.0667551
Mapk12	Mitogen-activated protein kinase 12 (EC 2.7.11.24)(Extracellular signal-regulated kinase 6)(ERK-6)(Stress-activated protein kinase 3)(Mitogen-activated protein kinase p38 gamma)(MAP kinase p38 gamma) [Source:UniProtKB/Swiss-Prot;Acc:O08911]	-1.14446	1.07253	0.0493609	0.105179	0.256847	0.529669
Pik3cg	Phosphatidylinositol-4,5-bisphosphate 3-kinase catalytic subunit gamma isoform (EC 2.7.1.153)(PI3-kinase p110 subunit gamma)(PtdIns-3-kinase subunit p110)(PI3Kgamma)(PI3K)(p120-PI3K) [Source:UniProtKB/Swiss-Prot;Acc:Q9JHG7]	1.46148	-1.28166	0.642941	0.277341	0.376049	0.178856
Pik3r5	Phosphoinositide 3-kinase regulatory subunit 5 (PI3-kinase regulatory subunit 5)(PI3-kinase p101 subunit)(PtdIns-3-kinase p101)(p101-PI3K)(Phosphatidylinositol-4,5-bisphosphate 3-kinase regulatory subunit)(PtdIns-3-kinase regulatory subunit) [Source:UniProtKB/Swiss-Prot;Acc:Q5SW28]	-1.01187	1	0.114316	0.0887981	0.754575	0.162228
Ifna14	alpha-interferon precursor [Source:RefSeq peptide;Acc:NP_996753]	-1.48303	1.02915	0.417167	0.127694	0.756037	0.480057
Irf3	Interferon regulatory factor 3 (IRF-3) [Source:UniProtKB/Swiss-Prot;Acc:P70671]	1.20215	1.20308	1.05913	0.158728	0.605737	0.901503
Tollip	Toll-interacting protein [Source:UniProtKB/Swiss-Prot;Acc:Q9QZ06]	-1.12046	1.13312	0.296234	0.137809	0.518943	0.0418058
Cxcl11	C-X-C motif chemokine 11 Precursor (Small-inducible cytokine B11)(Interferon-inducible T-cell alpha chemoattractant)(I-TAC) [Source:UniProtKB/Swiss-Prot;Acc:Q9JHH5]	1.07109	1.00673	0.149042	0.0277574	0.632779	0.485249
Tbk1	Serine/threonine-protein kinase TBK1 (EC 2.7.11.1)(TANK-binding kinase 1)(T2K) [Source:UniProtKB/Swiss-Prot;Acc:Q9WUN2]	-1.13402	-1.16537	0.741109	0.228925	0.703501	0.321849
Ikbke	Inhibitor of nuclear factor kappa-B kinase subunit epsilon (I kappa-B kinase epsilon)(IkBKE)(IKK-epsilon)(IKK-E)(EC 2.7.11.10)(Inducible I kappa-B kinase)(IKK-i) [Source:UniProtKB/Swiss-Prot;Acc:Q9R0T8]	-1.19702	-1.19919	0.237107	0.229587	0.667835	0.165197
Map3k7ip1	Mitogen-activated protein kinase kinase kinase 7-interacting protein 1 (TGF-beta-activated kinase 1-binding protein 1)(TAK1-binding protein 1) [Source:UniProtKB/Swiss-Prot;Acc:Q8CF89]	1.23272	-1.34167	0.987949	0.267822	0.7665	0.313353
Map3k7ip2	Mitogen-activated protein kinase kinase kinase 7-interacting protein 2 (TAK1-binding protein 2)(TAB2) [Source:UniProtKB/Swiss-Prot;Acc:Q99K90]	-1.06343	-1.15275	0.387306	0.246451	0.266057	0.482727
Pik3cb	Phosphatidylinositol-4,5-bisphosphate 3-kinase catalytic subunit beta isoform (EC 2.7.1.153)(PI3-kinase p110 subunit beta)(PtdIns-3-kinase p110)(PI3Kbeta)(PI3K) [Source:UniProtKB/Swiss-Prot;Acc:Q8BTI9]	-1.06209	-1.28271	0.102409	0.0347644	0.932169	0.0670192
Tlr9	Toll-like receptor 9 Precursor (CD289 antigen) [Source:UniProtKB/Swiss-Prot;Acc:Q9EQU3]	-1.03404	1.0452	0.0565285	0.0680375	0.317467	0.0804636
Akt1	RAC-alpha serine/threonine-protein kinase (EC 2.7.11.1)(RAC-PK-alpha)(AKT1 kinase)(C-AKT)(Protein kinase B)(PKB)(Thymoma viral proto-oncogene) [Source:UniProtKB/Swiss-Prot;Acc:P31750]	1.09115	-1.09456	0.0796592	0.102268	0.379037	0.00723133
Il12a	Interleukin-12 subunit alpha Precursor (IL-12A)(IL-12 subunit p35)(Cytotoxic lymphocyte maturation factor 35 kDa subunit)(CLMF p35) [Source:UniProtKB/Swiss-Prot;Acc:P43431]	-1.04321	1.08067	0.0807464	0.077818	0.355763	0.119547
Ly96	Lymphocyte antigen 96 Precursor (Protein MD-2)(ESOP-1) [Source:UniProtKB/Swiss-Prot;Acc:Q9JHF9]	-2.36636	1.34653	0.248127	1.56199	0.0631782	0.920127
Nfkb2	Nuclear factor NF-kappa-B p100 subunit (DNA-binding factor KBF2) [Contains Nuclear factor NF-kappa-B p52 subunit] [Source:UniProtKB/Swiss-Prot;Acc:Q9WTK5]	-1.44082	1.57759	0.274751	0.772528	0.317407	0.190206
Pik3r1	Phosphatidylinositol 3-kinase regulatory subunit alpha (PI3-kinase p85 subunit alpha)(PtdIns-3-kinase p85-alpha)(PI3K) [Source:UniProtKB/Swiss-Prot;Acc:P26450]	-1.06493	-1.82633	0.702354	0.2598	0.791357	0.0664415
Rac1	Ras-related C3 botulinum toxin substrate 1 Precursor (p21-Rac1) [Source:UniProtKB/Swiss-Prot;Acc:P63001]	-3.31461	-1.07038	0.341161	0.177878	0.96906	0.567036
Rela	Transcription factor p65 (Nuclear factor NF-kappa-B p65 subunit) [Source:UniProtKB/Swiss-Prot;Acc:Q04207]	1.73816	-1.25723	2.10548	0.0963272	0.495858	0.87241
Tlr6	Toll-like receptor 6 Precursor (CD286 antigen) [Source:UniProtKB/Swiss-Prot;Acc:Q9EPW9]	-1.98207	1.10388	0.3643	0.0630114	0.635322	0.180208
Traf6	TNF receptor-associated factor 6 [Source:UniProtKB/Swiss-Prot;Acc:P70196]	-1.01486	1.00669	0.0456712	0.05793	0.554431	0.336641
Mapk8	Mitogen-activated protein kinase 8 (EC 2.7.11.24)(Stress-activated protein kinase JNK1)(c-Jun N-terminal kinase 1) [Source:UniProtKB/Swiss-Prot;Acc:Q91Y86]	1.66258	1.05255	0.882626	0.0578773	0.426945	0.168836
Tlr5	Toll-like receptor 5 Precursor [Source:UniProtKB/Swiss-Prot;Acc:Q9JLF7]	-1.79637	1.18759	0.231358	0.169692	0.290867	0.349175
Toll-like receptor signaling pathway
Gene symbol	Gene description	FC_Colonic tissue	FC_Spleen	SD_Colonic tissue	SD_Spleen	p-value_Colonic tissue	p-value_Spleen
Card11	Caspase recruitment domain-containing protein 11 [Source:UniProtKB/Swiss-Prot;Acc:Q8CIS0]	-1.79521	1.00413	0.327574	0.123523	0.427329	0.00978865
Akt1	RAC-alpha serine/threonine-protein kinase (EC 2.7.11.1)(RAC-PK-alpha)(AKT1 kinase)(C-AKT)(Protein kinase B)(PKB)(Thymoma viral proto-oncogene) [Source:UniProtKB/Swiss-Prot;Acc:P31750]	1.09115	-1.09456	0.0796592	0.102268	0.379037	0.00723133
Rhoa	Transforming protein RhoA Precursor [Source:UniProtKB/Swiss-Prot;Acc:Q9QUI0]	-1.03995	1.01043	0.128052	0.0656909	0.529353	0.161933
Bcl10	B-cell lymphoma/leukemia 10 (B-cell CLL/lymphoma 10)(Bcl-10)(CED-3/ICH-1 prodomain homologous E10-like regulator)(mCIPER)(CARD-containing molecule enhancing NF-kappa-B)(Cellular homolog of vCARMEN)(cCARMEN)(Mammalian CARD-containing adapter molecule E10)(mE10)(Cellular-E10)(c-E10)(CARD-like apoptotic protein)(mCLAP) [Source:UniProtKB/Swiss-Prot;Acc:Q9Z0H7]	1.20569	-1.22945	0.904548	0.343082	0.241163	0.373493
Cbl	E3 ubiquitin-protein ligase CBL (EC 6.3.2.-)(Signal transduction protein CBL)(Proto-oncogene c-CBL)(Casitas B-lineage lymphoma proto-oncogene) [Source:UniProtKB/Swiss-Prot;Acc:P22682]	-1.09162	1.03144	0.0889016	0.0740014	0.370849	0.217703
Ctla4	Cytotoxic T-lymphocyte protein 4 Precursor (Cytotoxic T-lymphocyte-associated antigen 4)(CTLA-4)(CD152 antigen) [Source:UniProtKB/Swiss-Prot;Acc:P09793]	-3.044	-1.0057	0.300998	0.0747671	0.365244	0.450986
Cd28	T-cell-specific surface glycoprotein CD28 Precursor (CD28 antigen) [Source:UniProtKB/Swiss-Prot;Acc:P31041]	-1.70093	1.07221	0.448582	0.21765	0.776407	0.651597
Cd3d	T-cell surface glycoprotein CD3 delta chain Precursor (T-cell receptor T3 delta chain)(CD3d antigen) [Source:UniProtKB/Swiss-Prot;Acc:P04235]	1.08028	-1.21835	0.011099	0.365275	0.461081	0.239844
Cd3e	T-cell surface glycoprotein CD3 epsilon chain Precursor (T-cell surface antigen T3/Leu-4 epsilon chain)(CD3e antigen) [Source:UniProtKB/Swiss-Prot;Acc:P22646]	1.2243	1.53259	0.452665	0.844209	0.568855	0.485273
Cd3g	T-cell surface glycoprotein CD3 gamma chain Precursor (T-cell receptor T3 gamma chain)(CD3g antigen) [Source:UniProtKB/Swiss-Prot;Acc:P11942]	1.19559	2.172	0.486778	2.17313	0.557004	0.735354
Cd247	T-cell surface glycoprotein CD3 eta chain Precursor (T-cell receptor T3 eta chain) [Source:UniProtKB/Swiss-Prot;Acc:P29020]	1.04339	-1.01349	0.121011	0.0666653	0.666886	0.579802
Cd4	T-cell surface glycoprotein CD4 Precursor (T-cell surface antigen T4/Leu-3)(T-cell differentiation antigen L3T4)(CD4 antigen) [Source:UniProtKB/Swiss-Prot;Acc:P06332]	1.08929	1.04297	0.104307	0.0390453	0.76293	0.105613
Cdc42	Cell division control protein 42 homolog Precursor (G25K GTP-binding protein) [Source:UniProtKB/Swiss-Prot;Acc:P60766]	3.47377	-1.01671	3.61538	0.0109413	0.453488	0.425587
Cdk4	Cell division protein kinase 4 (EC 2.7.11.22)(Cyclin-dependent kinase 4)(PSK-J3)(CRK3) [Source:UniProtKB/Swiss-Prot;Acc:P30285]	-1.37784	1.08417	0.750788	0.309189	0.620182	0.421103
Csf2	Granulocyte-macrophage colony-stimulating factor Precursor (GM-CSF)(Colony-stimulating factor)(CSF) [Source:UniProtKB/Swiss-Prot;Acc:P01587]	1.01424	1.02379	0.194673	0.036304	0.516914	0.965724
Fyn	Proto-oncogene tyrosine-protein kinase Fyn (EC 2.7.10.2)(p59-Fyn) [Source:UniProtKB/Swiss-Prot;Acc:P39688]	1.03523	-1.03326	0.182007	0.016308	0.750709	0.454966
Grb2	Growth factor receptor-bound protein 2 (Adapter protein GRB2)(SH2/SH3 adapter GRB2) [Source:UniProtKB/Swiss-Prot;Acc:Q60631]	1.17725	-1.41322	1.13957	0.26773	0.957676	0.170502
Ptpn6	Tyrosine-protein phosphatase non-receptor type 6 (EC 3.1.3.48)(Protein-tyrosine phosphatase 1C)(PTP-1C)(Hematopoietic cell protein-tyrosine phosphatase)(70Z-SHP)(SH-PTP1)(SHP-1)(PTPTY-42) [Source:UniProtKB/Swiss-Prot;Acc:P29351]	-1.07164	-2.03532	0.403558	0.260474	0.809801	0.114376
Hras1	GTPase HRas Precursor (Transforming protein p21)(p21ras)(H-Ras-1)(c-H-ras) [Contains GTPase HRas, N-terminally processed] [Source:UniProtKB/Swiss-Prot;Acc:Q61411]	1.38082	-1.43407	0.550748	0.21279	0.33526	0.0344806
Ifng	Interferon gamma Precursor (IFN-gamma) [Source:UniProtKB/Swiss-Prot;Acc:P01580]	1.70497	1.27111	0.773608	0.233596	0.460501	0.848646
Ikbkb	Inhibitor of nuclear factor kappa-B kinase subunit beta (I-kappa-B-kinase beta)(IkBKB)(IKK-beta)(IKK-B)(EC 2.7.11.10)(I-kappa-B kinase 2)(IKK2)(Nuclear factor NF-kappa-B inhibitor kinase beta)(NFKBIKB) [Source:UniProtKB/Swiss-Prot;Acc:O88351]	-1.00214	-1.61209	0.394728	0.302657	0.0769546	0.114718
Ikbkg	NF-kappa-B essential modulator (NEMO)(NF-kappa-B essential modifier)(Inhibitor of nuclear factor kappa-B kinase subunit gamma)(IkB kinase subunit gamma)(I-kappa-B kinase gamma)(IKK-gamma)(IKKG)(IkB kinase-associated protein 1)(IKKAP1)(mFIP-3) [Source:UniProtKB/Swiss-Prot;Acc:O88522]	-1.2733	-1.34546	0.28029	0.245728	0.670055	0.392422
Il10	Interleukin-10 Precursor (IL-10)(Cytokine synthesis inhibitory factor)(CSIF) [Source:UniProtKB/Swiss-Prot;Acc:P18893]	1.00433	-1.04995	0.090733	0.0950838	0.47718	0.420403
Il2	Interleukin-2 Precursor (IL-2)(T-cell growth factor)(TCGF) [Source:UniProtKB/Swiss-Prot;Acc:P04351]	1.03365	1.06243	0.105884	0.0419066	0.836513	0.468051
Il4	Interleukin-4 Precursor (IL-4)(B-cell stimulatory factor 1)(BSF-1)(Lymphocyte stimulatory factor 1)(IGG1 induction factor)(B-cell IgG differentiation factor)(B-cell growth factor 1) [Source:UniProtKB/Swiss-Prot;Acc:P07750]	1.00919	1.05759	0.048933	0.024408	0.338929	0.859972
Il5	Interleukin-5 Precursor (IL-5)(T-cell replacing factor)(TRF)(Eosinophil differentiation factor)(B-cell growth factor II)(BCGF-II)(Cytotoxic T-lymphocyte inducer) [Source:UniProtKB/Swiss-Prot;Acc:P04401]	-1.02907	-1.00587	0.077896	0.0809283	0.814889	0.272955
Itk	Tyrosine-protein kinase ITK/TSK (EC 2.7.10.2)(T-cell-specific kinase)(IL-2-inducible T-cell kinase)(Kinase EMT)(Kinase TLK) [Source:UniProtKB/Swiss-Prot;Acc:Q03526]	-1.03862	1.0411	0.0511934	0.0545374	0.987093	0.852266
Jun	Transcription factor AP-1 (Activator protein 1)(AP1)(Proto-oncogene c-jun)(V-jun avian sarcoma virus 17 oncogene homolog)(Jun A)(AH119) [Source:UniProtKB/Swiss-Prot;Acc:P05627]	-1.38393	1.24796	0.952268	0.160835	0.652207	0.626431
Kras	GTPase KRas Precursor (K-Ras 2)(Ki-Ras)(c-K-ras)(c-Ki-ras) [Contains GTPase KRas, N-terminally processed] [Source:UniProtKB/Swiss-Prot;Acc:P32883]	1.06309	-1.44425	0.464298	0.140068	0.392301	0.0363407
Lat	Linker for activation of T-cells family member 1 (36 kDa phospho-tyrosine adapter protein)(pp36)(p36-38) [Source:UniProtKB/Swiss-Prot;Acc:O54957]	1.1955	1.16049	0.115347	0.47406	0.428737	0.295369
Lcp2	Lymphocyte cytosolic protein 2 (SH2 domain-containing leukocyte protein of 76 kDa)(SLP-76 tyrosine phosphoprotein)(SLP76) [Source:UniProtKB/Swiss-Prot;Acc:Q60787]	-1.17243	-1.0168	0.116059	0.259946	0.957435	0.27432
Grap2	GRB2-related adaptor protein 2 (GADS protein)(Growth factor receptor-binding protein)(GRBLG)(GRB-2-like protein)(GRB2L)(Hematopoietic cell-associated adaptor protein GrpL)(GRB-2-related monocytic adapter protein)(Monocytic adapter)(MONA)(Adapter protein GRID) [Source:UniProtKB/Swiss-Prot;Acc:O89100]	-1.74364	1.15936	0.323064	0.190098	0.408551	0.27821
Nck1	non-catalytic region of tyrosine kinase adaptor protein 1 [Source:RefSeq peptide;Acc:NP_035008]	1.15223	1.05304	0.186141	0.0684157	0.489748	0.121288
Nck2	non-catalytic region of tyrosine kinase adaptor protein 2 [Source:RefSeq peptide;Acc:NP_035009]	1.02947	-1.02969	1.48481	0.136168	0.544959	0.483224
Nfatc1	Nuclear factor of activated T-cells, cytoplasmic 1 (NF-ATc1)(NFAT transcription complex cytosolic component)(NF-ATc)(NFATc) [Source:UniProtKB/Swiss-Prot;Acc:O88942]	3.02041	1.11013	2.46798	0.553527	0.343746	0.595503
Nfkb2	Nuclear factor NF-kappa-B p100 subunit (DNA-binding factor KBF2) [Contains Nuclear factor NF-kappa-B p52 subunit] [Source:UniProtKB/Swiss-Prot;Acc:Q9WTK5]	-1.44082	1.57759	0.274751	0.772528	0.317407	0.190206
Nfkbia	NF-kappa-B inhibitor alpha (I-kappa-B-alpha)(IkappaBalpha)(IkB-alpha) [Source:UniProtKB/Swiss-Prot;Acc:Q9Z1E3]	1.00095	-1.05261	0.0944346	0.0653776	0.967544	0.462974
Nfkbie	NF-kappa-B inhibitor epsilon (NF-kappa-BIE)(I-kappa-B-epsilon)(IkappaBepsilon)(IkB-epsilon)(IkB-E) [Source:UniProtKB/Swiss-Prot;Acc:O54910]	-1.0383	-1.16815	0.138929	0.37426	0.973318	0.28325
Nras	GTPase NRas Precursor (Transforming protein N-Ras) [Source:UniProtKB/Swiss-Prot;Acc:P08556]	-1.0291	-1.26127	0.614945	0.084761	0.889119	0.264401
Pak1	Serine/threonine-protein kinase PAK 1 (EC 2.7.11.1)(p21-activated kinase 1)(PAK-1)(p65-PAK)(Alpha-PAK)(CDC42/RAC effector kinase PAK-A) [Source:UniProtKB/Swiss-Prot;Acc:O88643]	-1.12727	-1.06228	1.01958	0.100097	0.613098	0.258943
Pak3	Serine/threonine-protein kinase PAK 3 (EC 2.7.11.1)(p21-activated kinase 3)(PAK-3)(Beta-PAK)(CDC42/RAC effector kinase PAK-B) [Source:UniProtKB/Swiss-Prot;Acc:Q61036]	1.80609	1.01217	1.07323	0.0544693	0.405004	0.0822207
Pdcd1	Programmed cell death protein 1 Precursor (Protein PD-1)(mPD-1)(CD279 antigen) [Source:UniProtKB/Swiss-Prot;Acc:Q02242]	-1.1034	1.39305	0.166805	0.291795	0.568101	0.787085
Pik3ca	Phosphatidylinositol-4,5-bisphosphate 3-kinase catalytic subunit alpha isoform (EC 2.7.1.153)(PI3-kinase p110 subunit alpha)(PtdIns-3-kinase p110)(PI3K) [Source:UniProtKB/Swiss-Prot;Acc:P42337]	1.40568	-1.12181	0.667677	0.0423308	0.412142	0.190065
Pik3cd	Phosphatidylinositol-4,5-bisphosphate 3-kinase catalytic subunit delta isoform (EC 2.7.1.153)(PI3-kinase p110 subunit delta)(PtdIns-3-kinase p110)(PI3K)(p110delta) [Source:UniProtKB/Swiss-Prot;Acc:O35904]	1.4866	1.03579	1.92058	0.0617382	0.417994	0.985422
Pik3r2	Phosphatidylinositol 3-kinase regulatory subunit beta (PI3-kinase p85 subunit beta)(PtdIns-3-kinase p85-beta) [Source:UniProtKB/Swiss-Prot;Acc:O08908]	2.07688	1.04117	2.19115	0.0879784	0.283612	0.375425
Pik3r3	Phosphatidylinositol 3-kinase regulatory subunit gamma (PI3-kinase p85 subunit gamma)(PtdIns-3-kinase p85-gamma)(p55PIK) [Source:UniProtKB/Swiss-Prot;Acc:Q64143]	-1.51431	1.01702	0.0925939	0.0653766	0.193251	0.395638
Prkcq	Protein kinase C theta type (EC 2.7.11.13)(nPKC-theta) [Source:UniProtKB/Swiss-Prot;Acc:Q02111]	-1.15566	1.34011	0.103957	0.708566	0.734753	0.197483
Ppp3ca	Serine/threonine-protein phosphatase 2B catalytic subunit alpha isoform (EC 3.1.3.16)(Calmodulin-dependent calcineurin A subunit alpha isoform)(CAM-PRP catalytic subunit) [Source:UniProtKB/Swiss-Prot;Acc:P63328]	-1.04406	1.3979	1.29421	0.235106	0.483831	0.150587
Ppp3cb	Serine/threonine-protein phosphatase 2B catalytic subunit beta isoform (EC 3.1.3.16)(Calmodulin-dependent calcineurin A subunit beta isoform)(CAM-PRP catalytic subunit) [Source:UniProtKB/Swiss-Prot;Acc:P48453]	-1.03035	1.04185	0.0394349	0.0592451	0.608564	0.270792
Ppp3r1	Calcineurin subunit B type 1 (Protein phosphatase 2B regulatory subunit 1)(Protein phosphatase 3 regulatory subunit B alpha isoform 1) [Source:UniProtKB/Swiss-Prot;Acc:Q63810]	-1.02144	1.01892	0.0634301	0.105549	0.738288	0.0699909
Ptprc	Leukocyte common antigen Precursor (L-CA)(EC 3.1.3.48)(Lymphocyte antigen 5)(Ly-5)(T200)(CD45 antigen) [Source:UniProtKB/Swiss-Prot;Acc:P06800]	1.037	-1.45771	0.111539	0.146114	0.913753	0.135957
Rasgrp1	RAS guanyl-releasing protein 1 (Ras guanyl-releasing protein)(Calcium and DAG-regulated guanine nucleotide exchange factor II)(CalDAG-GEFII) [Source:UniProtKB/Swiss-Prot;Acc:Q9Z1S3]	-1.13594	1.06381	0.078183	0.0271672	0.254844	0.259969
Sos1	Son of sevenless homolog 1 (SOS-1)(mSOS-1) [Source:UniProtKB/Swiss-Prot;Acc:Q62245]	-1.14838	1.02414	0.142604	0.0483283	0.876147	0.0514815
Sos2	Son of sevenless homolog 2 (SOS-2)(mSOS-2) [Source:UniProtKB/Swiss-Prot;Acc:Q02384]	-1.62995	1.43713	0.456038	0.189721	0.399258	0.156433
Pak6	Serine/threonine-protein kinase PAK 6 (EC 2.7.11.1)(p21-activated kinase 6)(PAK-6) [Source:UniProtKB/Swiss-Prot;Acc:Q3ULB5]	-1.69358	1.29307	0.355389	0.311444	0.096516	0.95121
Tec	Tyrosine-protein kinase Tec (EC 2.7.10.2) [Source:UniProtKB/Swiss-Prot;Acc:P24604]	2.25684	-1.05499	1.75945	0.0351572	0.42015	0.614381
Tnf	Tumor necrosis factor Precursor (TNF-alpha)(Tumor necrosis factor ligand superfamily member 2)(TNF-a)(Cachectin) [Contains Tumor necrosis factor, membrane form;Tumor necrosis factor, soluble form] [Source:UniProtKB/Swiss-Prot;Acc:P06804]	-1.09467	1.01235	0.0744647	0.0316981	0.856612	0.674279
Cd40lg	CD40 ligand (CD40-L)(Tumor necrosis factor ligand superfamily member 5)(TNF-related activation protein)(TRAP)(T-cell antigen Gp39)(CD154 antigen) [Contains CD40 ligand, membrane form;CD40 ligand, soluble form] [Source:UniProtKB/Swiss-Prot;Acc:P27548]	-1.0218	1.02765	0.0522133	0.0746418	0.539168	0.185961
Vav1	Proto-oncogene vav (p95vav) [Source:UniProtKB/Swiss-Prot;Acc:P27870]	1.48807	-1.44844	0.85121	0.439396	0.302092	0.187932
Vav2	Guanine nucleotide exchange factor VAV2 (VAV-2) [Source:UniProtKB/Swiss-Prot;Acc:Q60992]	-1.01426	-1.17105	0.639859	0.346258	0.793749	0.116532
Pak2	Serine/threonine-protein kinase PAK 2 (EC 2.7.11.1)(p21-activated kinase 2)(PAK-2)(Gamma-PAK) [Contains PAK-2p27;PAK-2p34] [Source:UniProtKB/Swiss-Prot;Acc:Q8CIN4]	-1.03067	-1.14788	0.316519	0.154976	0.818619	0.372155
Zap70	Tyrosine-protein kinase ZAP-70 (EC 2.7.10.2)(70 kDa zeta-associated protein)(Syk-related tyrosine kinase) [Source:UniProtKB/Swiss-Prot;Acc:P43404]	-1.05028	1.09229	0.0880408	0.1934	0.975015	0.445874
Pdk1	[Pyruvate dehydrogenase [lipoamide]] kinase isozyme 1, mitochondrial Precursor (EC 2.7.11.2)(Pyruvate dehydrogenase kinase isoform 1) [Source:UniProtKB/Swiss-Prot;Acc:Q8BFP9]	-1.17931	-1.27445	0.752019	0.0681213	0.812842	0.0106582
Akt3	RAC-gamma serine/threonine-protein kinase (EC 2.7.11.1)(RAC-PK-gamma)(Protein kinase Akt-3)(Protein kinase B, gamma)(PKB gamma) [Source:UniProtKB/Swiss-Prot;Acc:Q9WUA6]	-1.01225	1.04311	0.120519	0.0254903	0.963763	0.543696
Malt1	Mucosa-associated lymphoid tissue lymphoma translocation protein 1 homolog (EC 3.4.22.-)(Paracaspase) [Source:UniProtKB/Swiss-Prot;Acc:Q2TBA3]	1.06576	-1.02542	0.155765	0.0185811	0.431431	0.0127172
Pak7	Serine/threonine-protein kinase PAK 7 (EC 2.7.11.1)(p21-activated kinase 7)(PAK-7)(p21-activated kinase 5) [Source:UniProtKB/Swiss-Prot;Acc:Q8C015]	-1.11106	1.03032	0.129712	0.0760529	0.985066	0.478098
Map3k8	Mitogen-activated protein kinase kinase kinase 8 (EC 2.7.11.25)(COT proto-oncogene serine/threonine-protein kinase)(Cancer Osaka thyroid oncogene)(C-COT) [Source:UniProtKB/Swiss-Prot;Acc:Q07174]	-1.10488	-1.01283	0.120379	0.0737013	0.54673	0.159943
Pik3cg	Phosphatidylinositol-4,5-bisphosphate 3-kinase catalytic subunit gamma isoform (EC 2.7.1.153)(PI3-kinase p110 subunit gamma)(PtdIns-3-kinase subunit p110)(PI3Kgamma)(PI3K)(p120-PI3K) [Source:UniProtKB/Swiss-Prot;Acc:Q9JHG7]	1.46148	-1.28166	0.642941	0.277341	0.376049	0.178856
Pik3r5	Phosphoinositide 3-kinase regulatory subunit 5 (PI3-kinase regulatory subunit 5)(PI3-kinase p101 subunit)(PtdIns-3-kinase p101)(p101-PI3K)(Phosphatidylinositol-4,5-bisphosphate 3-kinase regulatory subunit)(PtdIns-3-kinase regulatory subunit) [Source:UniProtKB/Swiss-Prot;Acc:Q5SW28]	-1.01187	1	0.114316	0.0887981	0.754575	0.162228
Map3k14	Mitogen-activated protein kinase kinase kinase 14 (EC 2.7.11.25)(Serine/threonine-protein kinase NIK)(NF-kappa beta-inducing kinase) [Source:UniProtKB/Swiss-Prot;Acc:Q9WUL6]	-1.05206	1.02389	0.0294187	0.0278444	0.926809	0.69711
Icos	Inducible T-cell costimulator Precursor (Activation-inducible lymphocyte immunomediatory molecule)(CD28 and CTLA-4-like protein)(CCLP)(CD28-related protein 1)(CRP-1)(CD278 antigen) [Source:UniProtKB/Swiss-Prot;Acc:Q9WVS0]	1.05396	-1.04141	0.106309	0.0495808	0.901619	0.531198
Nfat5	Nuclear factor of activated T-cells 5 (NF-AT5)(T-cell transcription factor NFAT5)(Rel domain-containing transcription factor NFAT5) [Source:UniProtKB/Swiss-Prot;Acc:Q9WV30]	-4.7802	1.817	0.227378	2.06454	0.393042	0.6213
1500003O03Rik	Calcium-binding protein p22 (Calcium-binding protein CHP)(Calcineurin homologous protein)(Sid 470) [Source:UniProtKB/Swiss-Prot;Acc:P61022]	1.16094	-1.25927	0.788555	0.168578	0.305665	0.433725
Vav3	Guanine nucleotide exchange factor VAV3 (VAV-3) [Source:UniProtKB/Swiss-Prot;Acc:Q9R0C8]	1.28131	1.03417	0.508001	0.0354419	0.472644	0.0596028
Nfatc4	Nuclear factor of activated T-cells, cytoplasmic 4 (NF-ATc4)(NFATc4)(T-cell transcription factor NFAT3)(NF-AT3) [Source:UniProtKB/Swiss-Prot;Acc:Q8K120]	-1.30483	-1.10021	0.290961	0.101235	0.708133	0.000999736
Pik3cb	Phosphatidylinositol-4,5-bisphosphate 3-kinase catalytic subunit beta isoform (EC 2.7.1.153)(PI3-kinase p110 subunit beta)(PtdIns-3-kinase p110)(PI3Kbeta)(PI3K) [Source:UniProtKB/Swiss-Prot;Acc:Q8BTI9]	-1.06209	-1.28271	0.102409	0.0347644	0.932169	0.0670192
Cblc	Signal transduction protein CBL-C (SH3-binding protein CBL-C)(CBL-3) [Source:UniProtKB/Swiss-Prot;Acc:Q80XL1]	-1.04857	1.11691	1.30407	0.0664831	0.298903	0.417633
Akt2	RAC-beta serine/threonine-protein kinase (EC 2.7.11.1)(RAC-PK-beta)(Protein kinase Akt-2)(Protein kinase B, beta)(PKB beta) [Source:UniProtKB/Swiss-Prot;Acc:Q60823]	1.04045	-1.08301	0.0316705	0.0888059	0.394797	0.72303
Cd8b1	T-cell surface glycoprotein CD8 beta chain Precursor (T-cell surface glycoprotein Lyt-3)(T-cell membrane glycoprotein Ly-3)(Lymphocyte antigen 3)(CD8b antigen) [Source:UniProtKB/Swiss-Prot;Acc:P10300]	-1.06619	1.03469	0.110491	0.359313	0.974973	0.323296
Chuk	Inhibitor of nuclear factor kappa-B kinase subunit alpha (I kappa-B kinase alpha)(IkBKA)(IKK-alpha)(IKK-A)(IkappaB kinase)(EC 2.7.11.10)(I-kappa-B kinase 1)(IKK1)(Conserved helix-loop-helix ubiquitous kinase)(Nuclear factor NF-kappa-B inhibitor kinase alpha)(NFKBIKA) [Source:UniProtKB/Swiss-Prot;Acc:Q60680]	-1.11343	-1.06779	0.150437	0.214191	0.298844	0.316585
Fos	Proto-oncogene protein c-fos (Cellular oncogene fos) [Source:UniProtKB/Swiss-Prot;Acc:P01101]	-1.31645	1.5106	1.12509	0.27353	0.974241	0.931922
Lck	Proto-oncogene tyrosine-protein kinase LCK (EC 2.7.10.2)(Lymphocyte cell-specific protein-tyrosine kinase)(p56-LCK)(LSK) [Source:UniProtKB/Swiss-Prot;Acc:P06240]	1.29374	-1.20532	1.02939	0.554689	0.842578	0.27305
Nfatc2	Nuclear factor of activated T-cells, cytoplasmic 2 (T-cell transcription factor NFAT1)(NFAT pre-existing subunit)(NF-ATp) [Source:UniProtKB/Swiss-Prot;Acc:Q60591]	-2.17579	-1.02096	0.34295	0.00430002	0.336264	0.444441
Nfatc3	Nuclear factor of activated T-cells, cytoplasmic 3 (NF-ATc3)(NFATc3)(T-cell transcription factor NFAT4)(NF-AT4)(NFATx) [Source:UniProtKB/Swiss-Prot;Acc:P97305]	1.67832	-1.2715	0.609227	0.300998	0.334133	0.00190302
Nfkb1	Nuclear factor NF-kappa-B p105 subunit (DNA-binding factor KBF1)(EBP-1)(NF-kappa-B1 p84/NF-kappa-B1 p98) [Contains Nuclear factor NF-kappa-B p50 subunit] [Source:UniProtKB/Swiss-Prot;Acc:P25799]	-1.25329	-1.11876	0.554502	0.237395	0.332152	0.61692
Nfkbib	NF-kappa-B inhibitor beta (NF-kappa-BIB)(I-kappa-B-beta)(IkappaBbeta)(IkB-beta)(IkB-B) [Source:UniProtKB/Swiss-Prot;Acc:Q60778]	-1.12627	1.08216	0.117907	0.0857985	0.253138	0.352129
Pik3r1	Phosphatidylinositol 3-kinase regulatory subunit alpha (PI3-kinase p85 subunit alpha)(PtdIns-3-kinase p85-alpha)(PI3K) [Source:UniProtKB/Swiss-Prot;Acc:P26450]	-1.06493	-1.82633	0.702354	0.2598	0.791357	0.0664415
Plcg1	1-phosphatidylinositol-4,5-bisphosphate phosphodiesterase gamma-1 (EC 3.1.4.11)(Phosphoinositide phospholipase C)(Phospholipase C-gamma-1)(PLC-gamma-1)(PLC-II)(PLC-148) [Source:UniProtKB/Swiss-Prot;Acc:Q62077]	-1.13906	-1.01695	0.0660509	0.121205	0.474661	0.96992
Ppp3cc	Serine/threonine-protein phosphatase 2B catalytic subunit gamma isoform (EC 3.1.3.16)(Calmodulin-dependent calcineurin A subunit gamma isoform)(Calcineurin, testis-specific catalytic subunit)(CAM-PRP catalytic subunit) [Source:UniProtKB/Swiss-Prot;Acc:P48455]	1.00407	1.37704	1.03692	0.564895	0.870515	0.422651
Cblb	E3 ubiquitin-protein ligase CBL-B (EC 6.3.2.-)(Signal transduction protein CBL-B)(SH3-binding protein CBL-B)(Casitas B-lineage lymphoma proto-oncogene b) [Source:UniProtKB/Swiss-Prot;Acc:Q3TTA7]	-1.03831	-1.0409	0.163407	0.044774	0.663786	0.966683
Pak4	Serine/threonine-protein kinase PAK 4 (EC 2.7.11.1)(p21-activated kinase 4)(PAK-4) [Source:UniProtKB/Swiss-Prot;Acc:Q8BTW9]	1.90844	-1.62621	0.177359	0.310613	0.371408	0.608439
